# Supplementary material for: Four-component reaction of N-alkylimidazoles(N-alkylbenzimidazoles), dialkyl but-2-ynedioate, N-alkylisatins and malononitrile
Source: Royal Society of Chemistry journal article supplement (doi:10.1039/c4ra12278j), 2014-01-01

**Four-component reaction of *N*-alkylimidazoles (*N*-alkylbenzimidazoles), but-2-ynedioate, *N*-alkylisatins and malononitrile**

Fan Yang, Li-Juan Zhang, Chao-Guo Yan\*

**Supporting Information**

**The characterization data and  $^1\text{H}$ ,  $^{13}\text{C}$  NMR spectra of new compounds**

**2-30**

**Dimethyl 1'-benzyl-8,8-dicyano-2'-oxo-1-phenyl-8,8a-dihydro-1H-spiro[imidazo[1,2-a]pyridine-7,3'-indoline]-5,6-dicarboxylate (1a):**

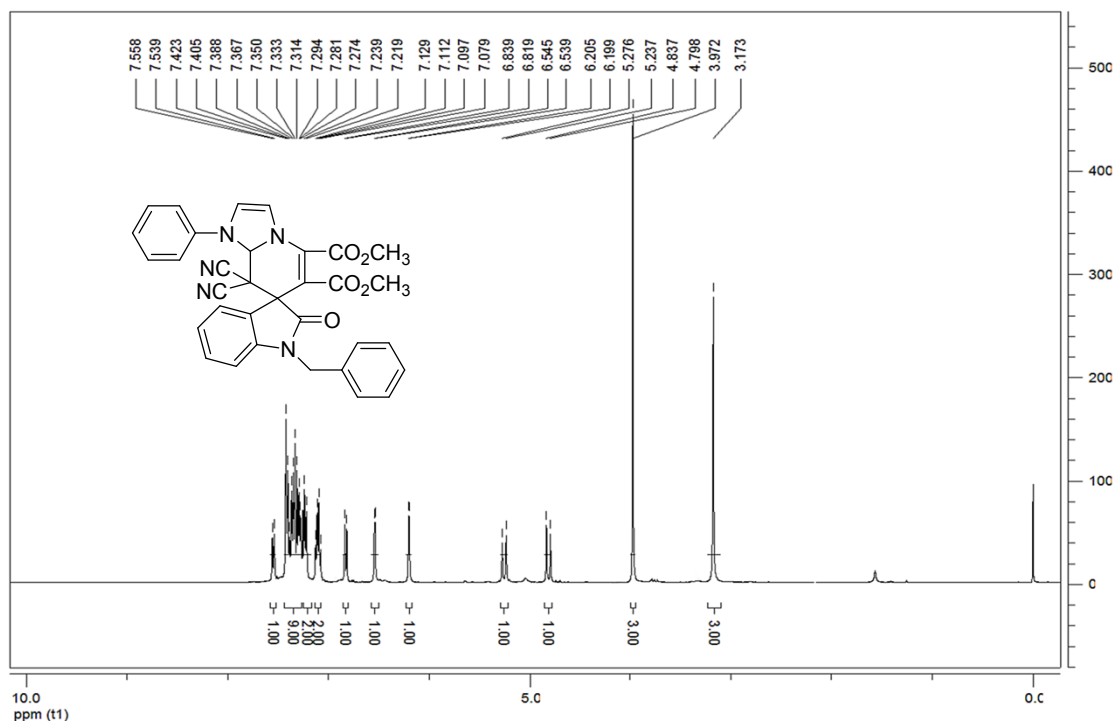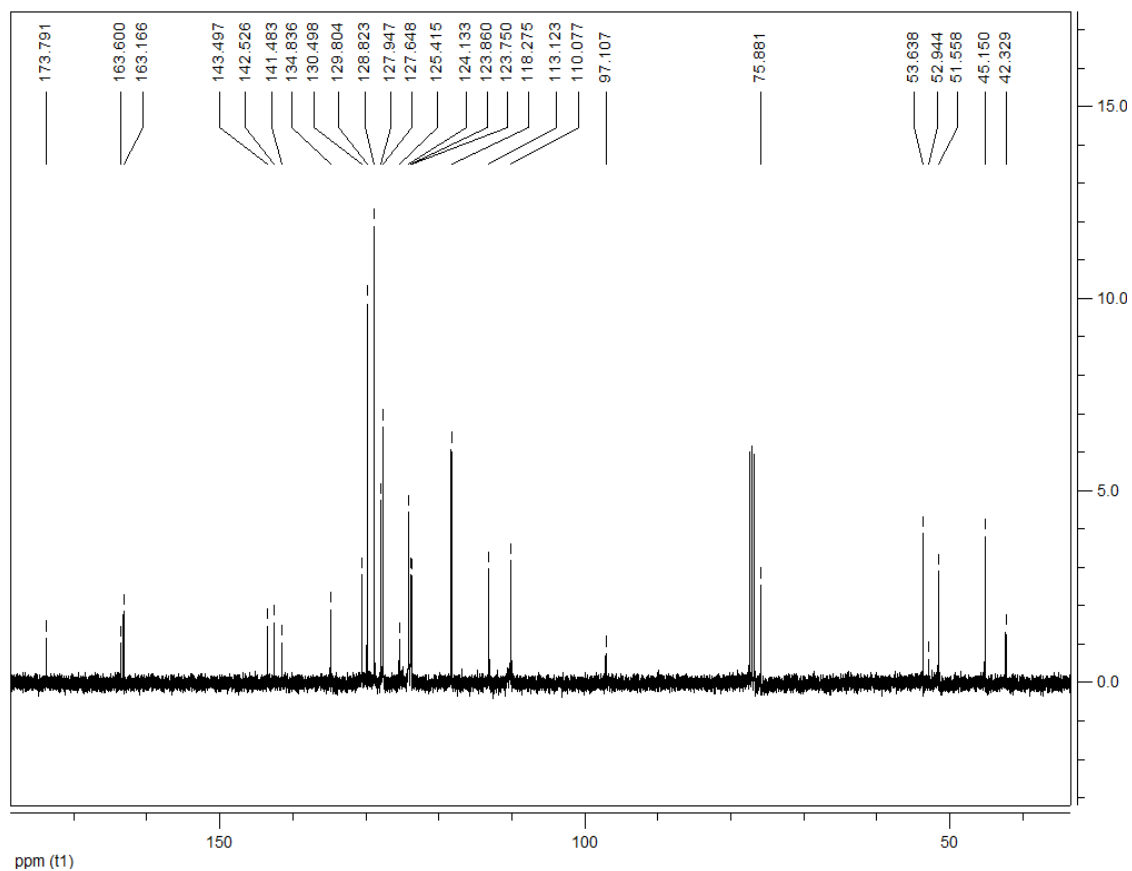

**Dimethyl 1'-butyl-8,8-dicyano-2'-oxo-1-phenyl-8,8a-dihydro-1H-spiro[imidazo[1,2-**

**a]pyridine-7,3'-indoline]-5,6-dicarboxylate (1b):**

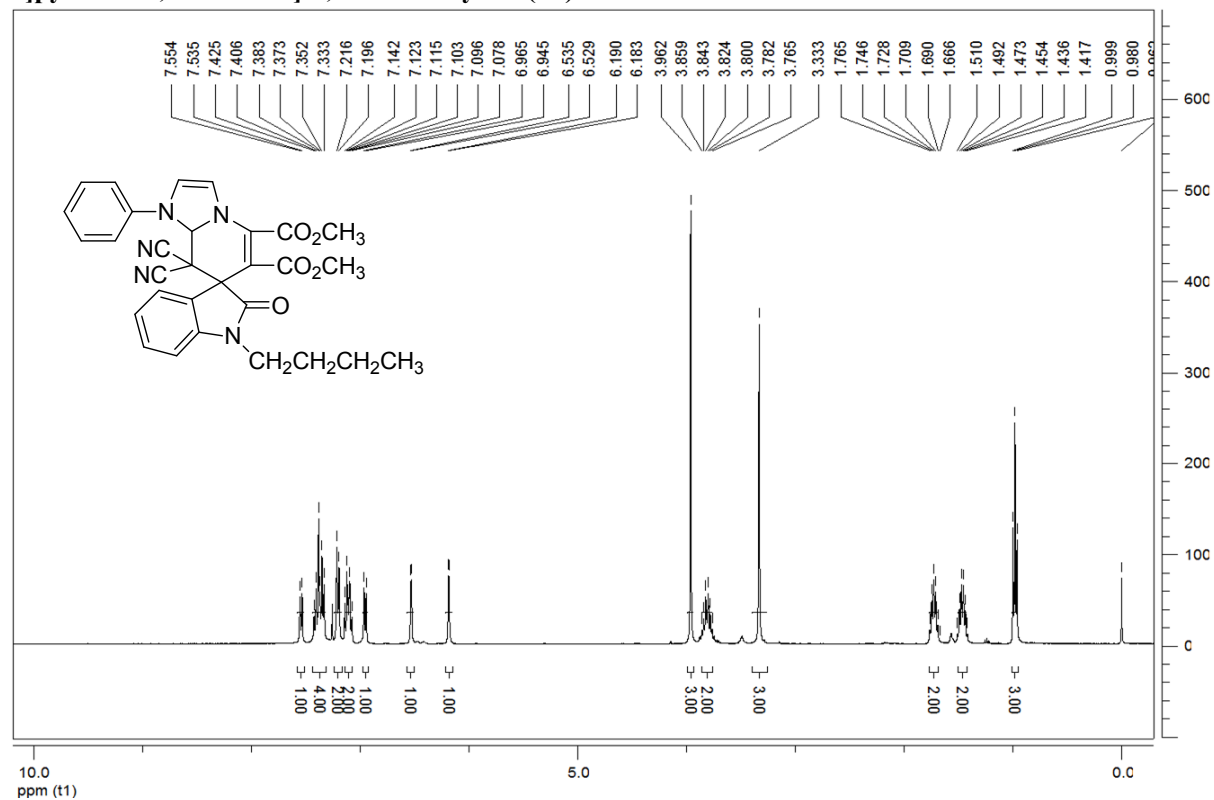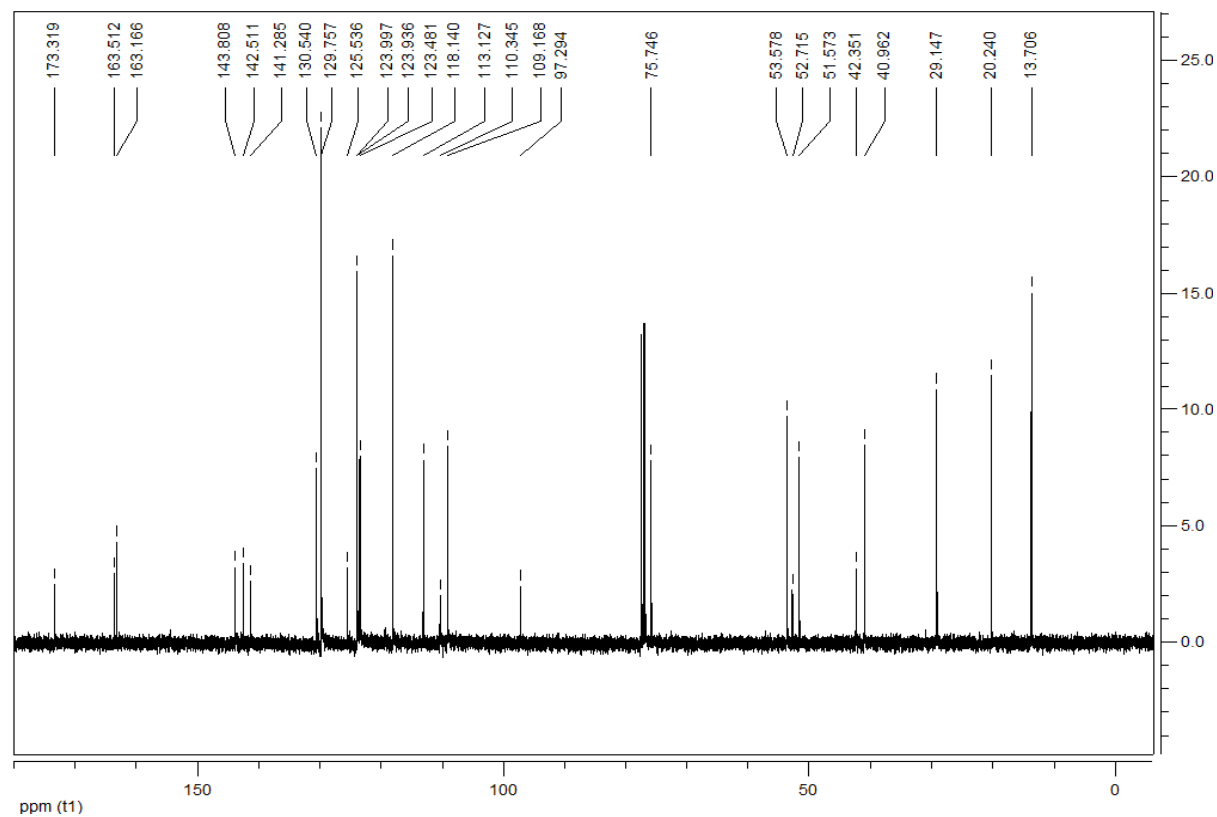

**Dimethyl 1'-benzyl-8,8-dicyano-5'-methyl-2'-oxo-1-phenyl-8,8a-dihydro-1H-spiro[imidazo[1,2-a]pyridine-7,3'-indoline]-5,6-dicarboxylate (1c):**

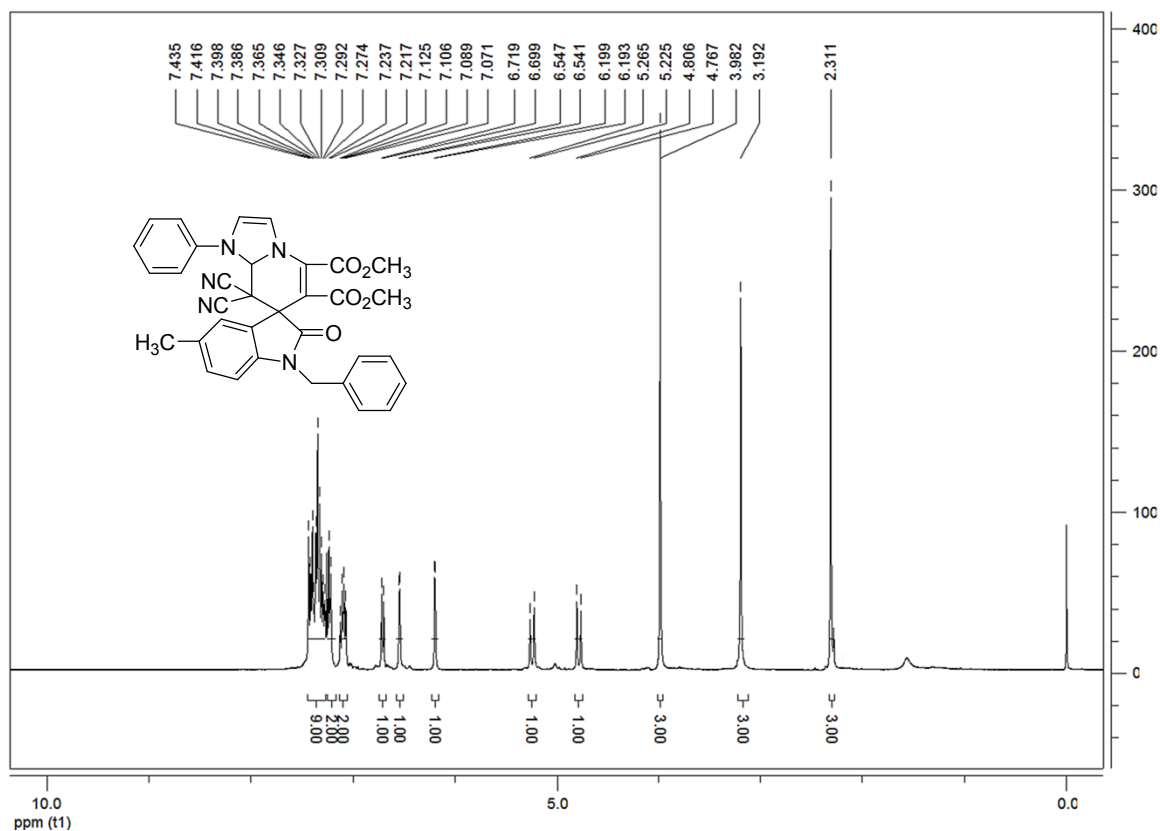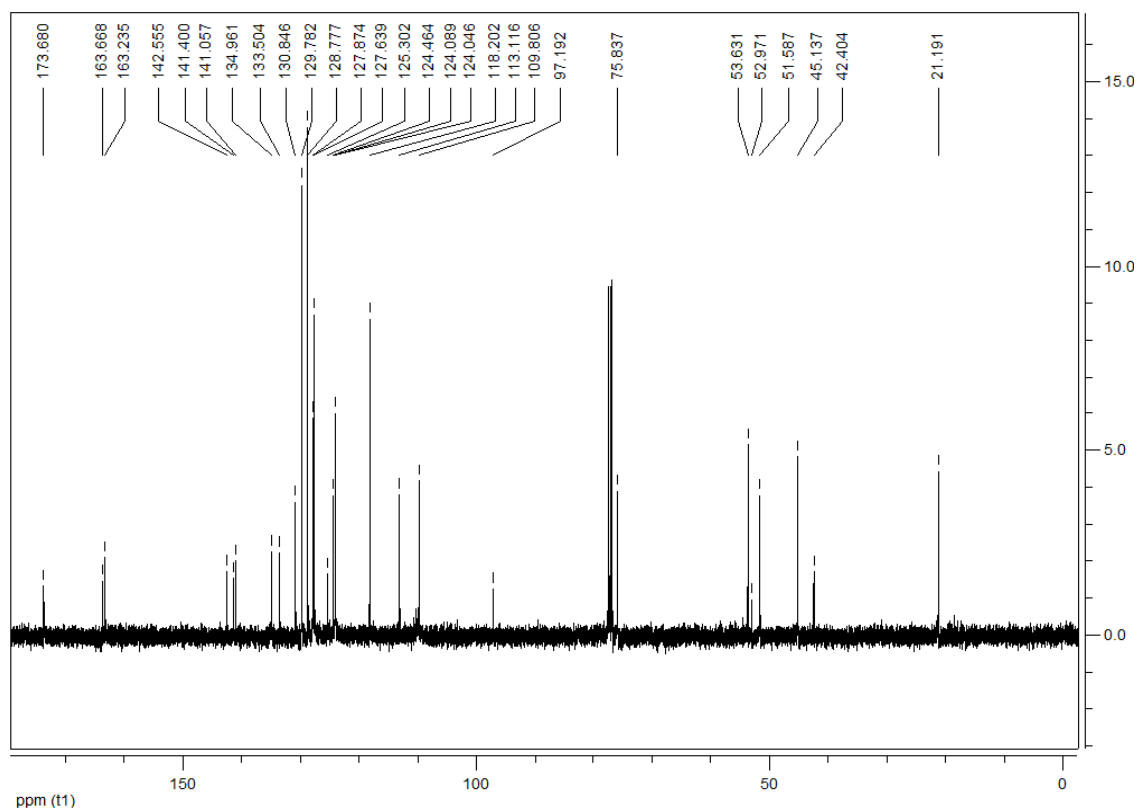

**Dimethyl 1'-butyl-8,8-dicyano-5'-methyl-2'-oxo-1-phenyl-8,8a-dihydro-1H-spiro[imidazo[1,2-a]pyridine-7,3'-indoline]-5,6-dicarboxylate (1d):**

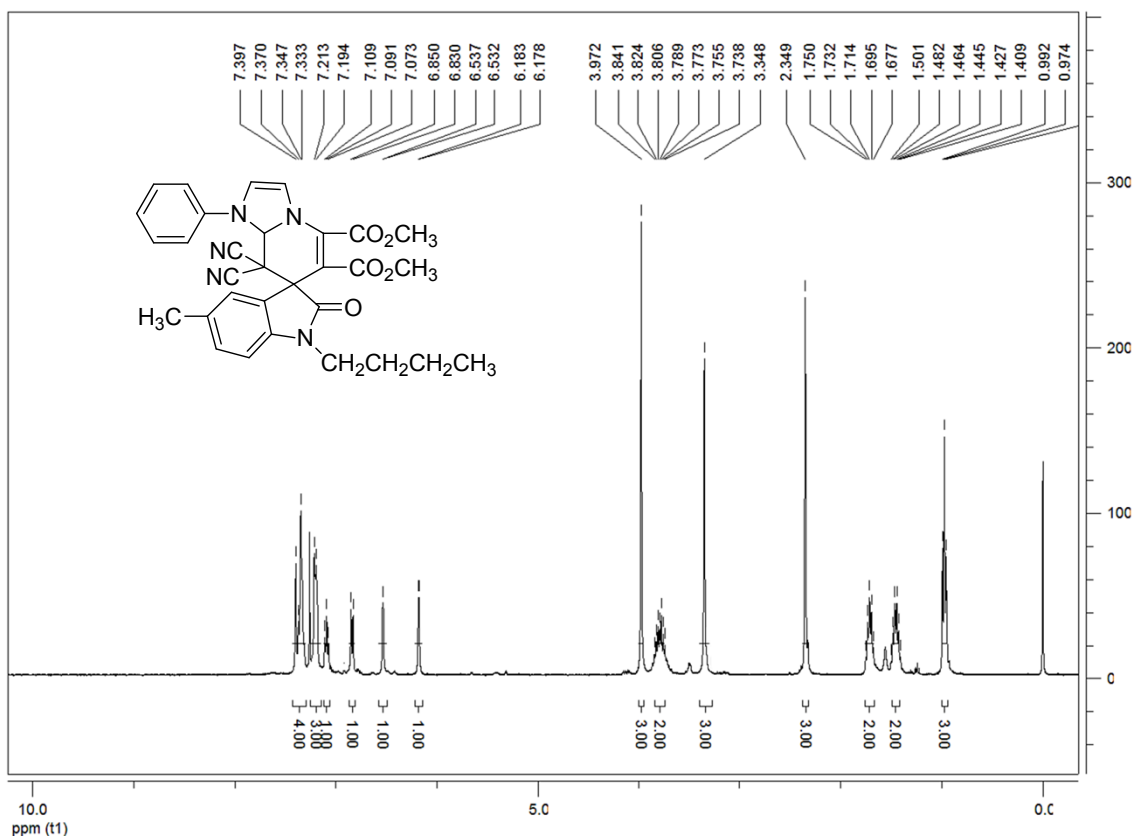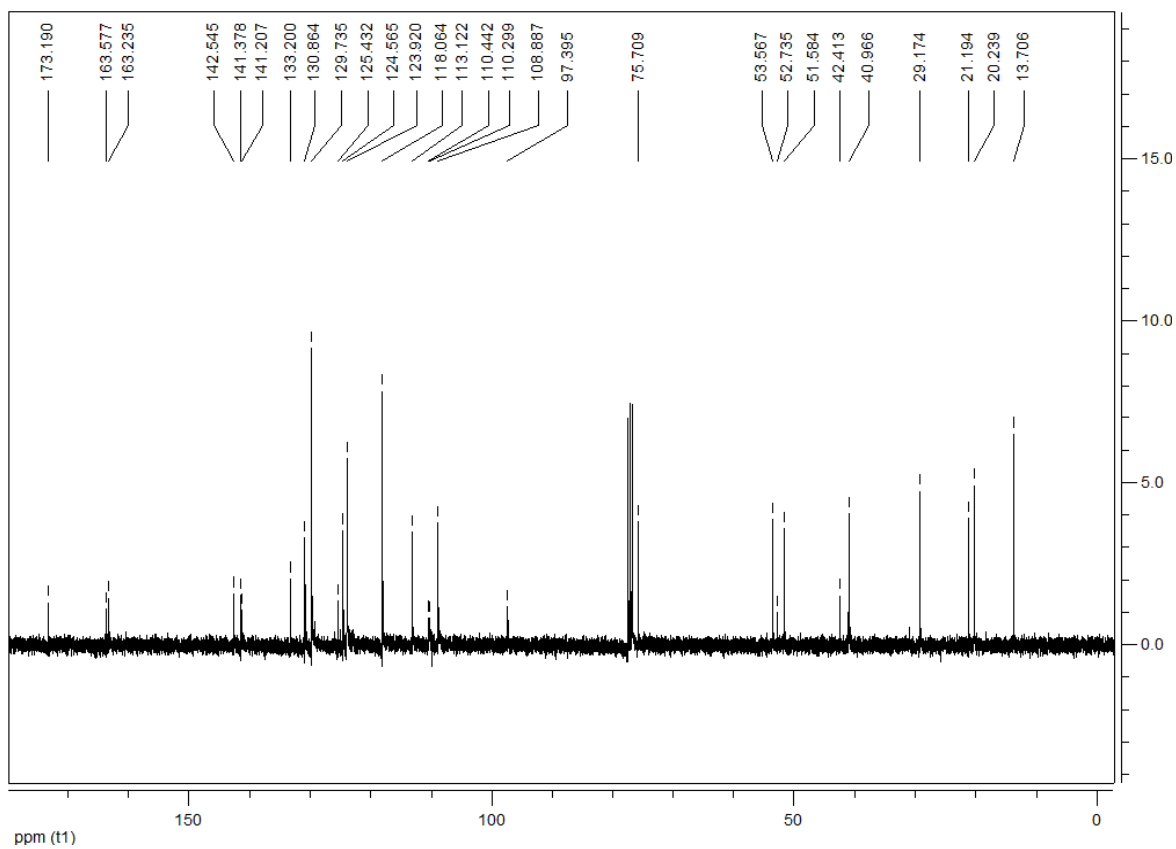

**Dimethyl 1'-benzyl-5'-chloro-8,8-dicyano-2'-oxo-1-phenyl-8,8a-dihydro-1H-spiro[imidazo[1,2-a]pyridine-7,3'-indoline]-5,6-dicarboxylate (1e):**

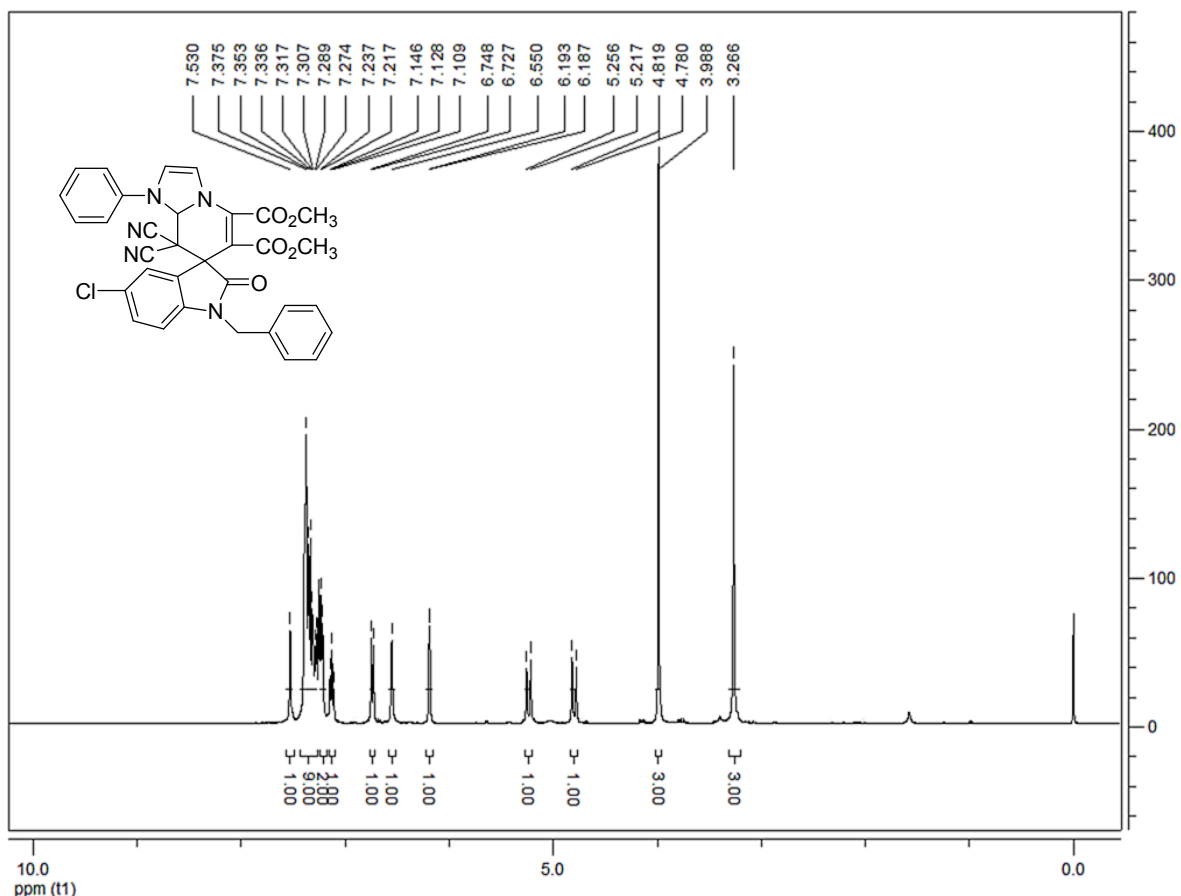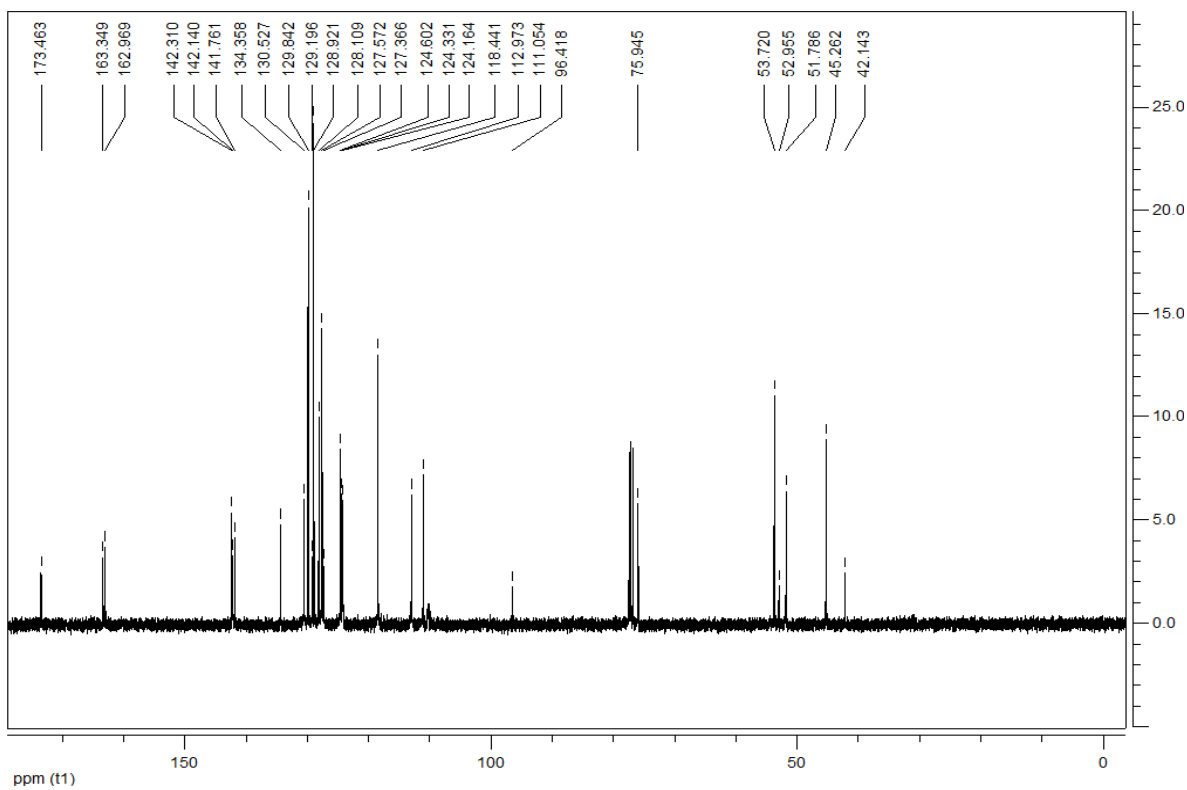

**Dimethyl 5'-chloro-8,8-dicyano-2'-oxo-1-phenyl-1'-propyl-8,8a-dihydro-1H-spiro[imidazo[1,2-a]pyridine-7,3'-indoline]-5,6-dicarboxylate (1f):**

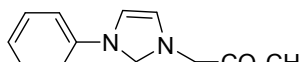

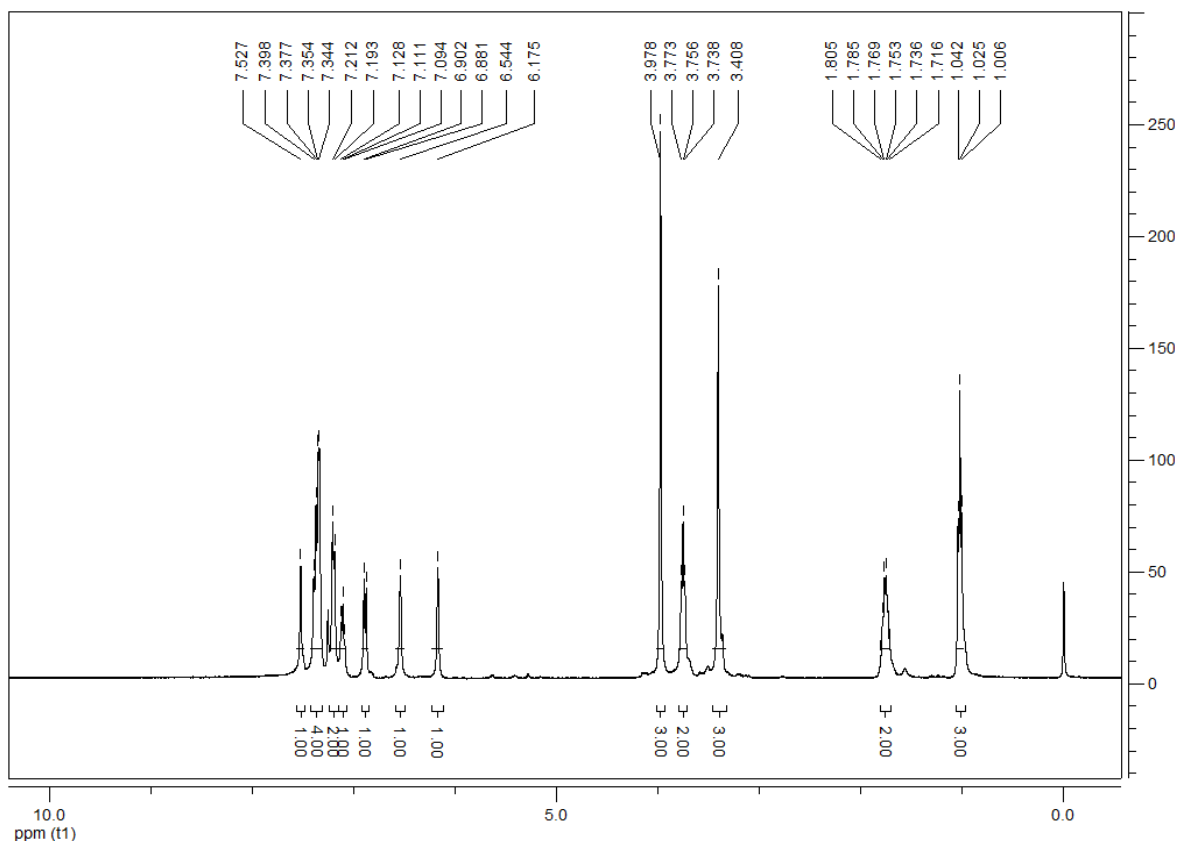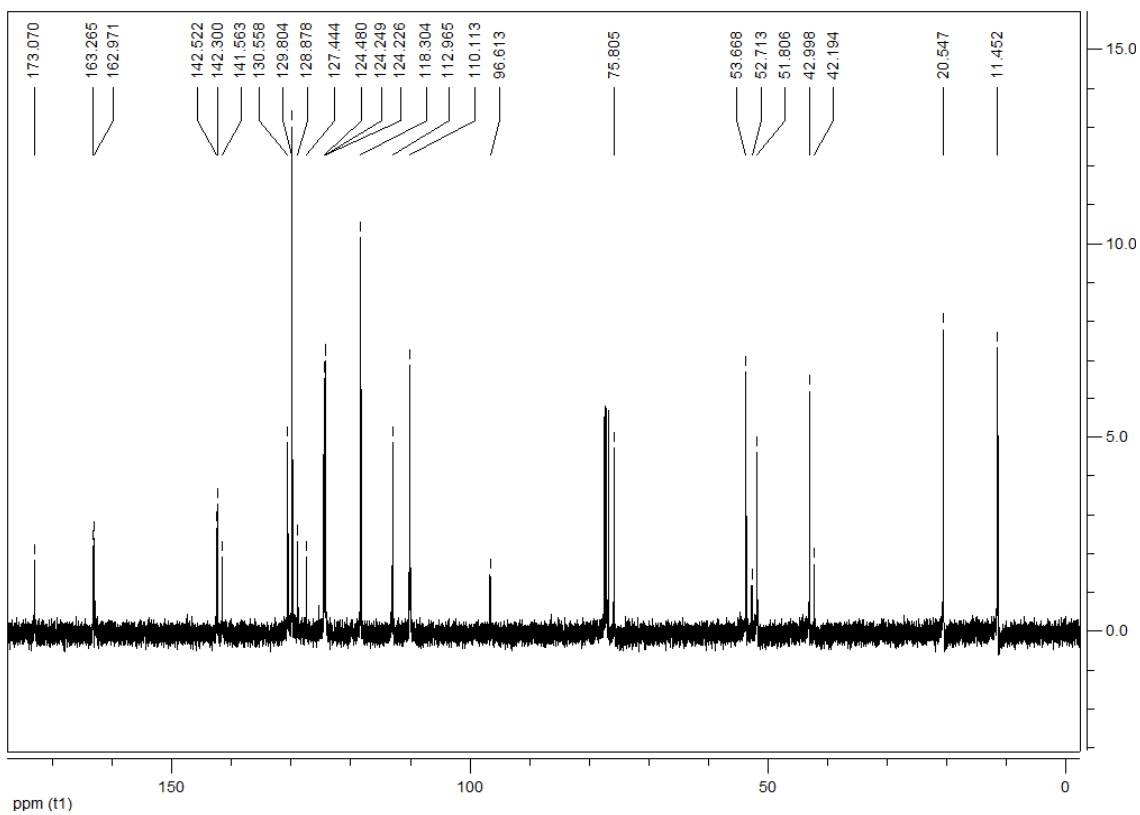

**Dimethyl 1'-benzyl-8,8-dicyano-5'-fluoro-2'-oxo-1-phenyl-8,8a-dihydro-1H-spiro[imidazo[1,2-a]pyridine-7,3'-indoline]-5,6-dicarboxylate (1g):**





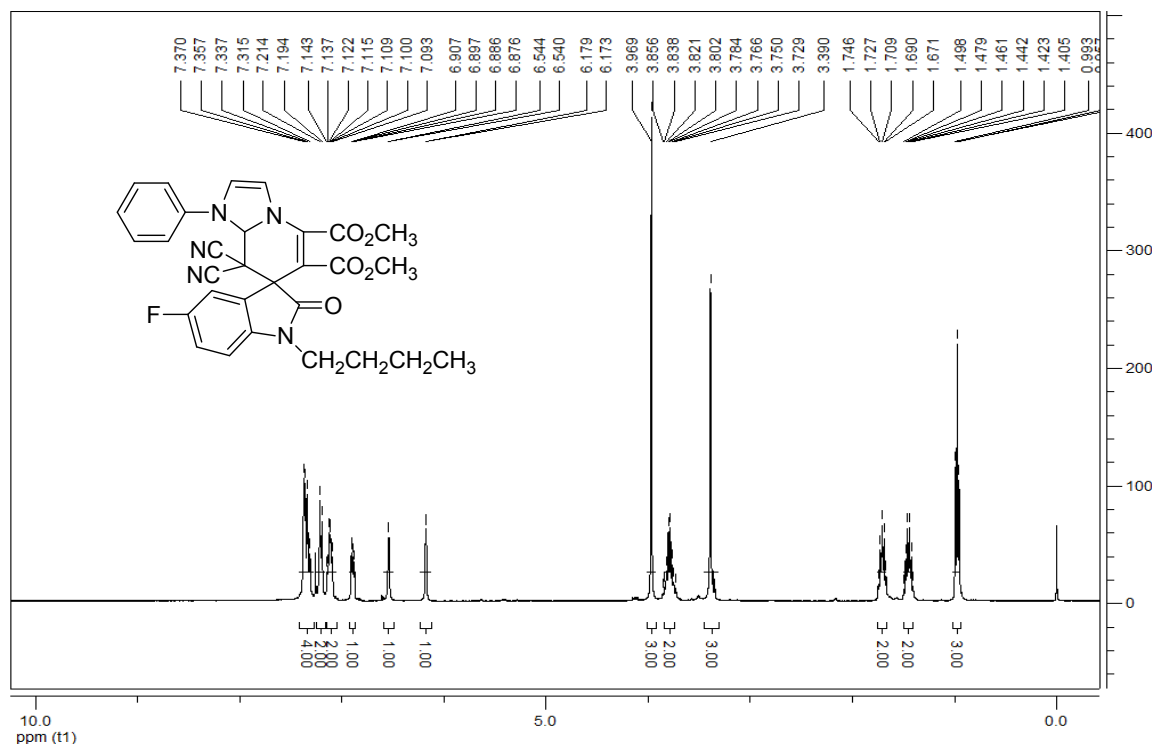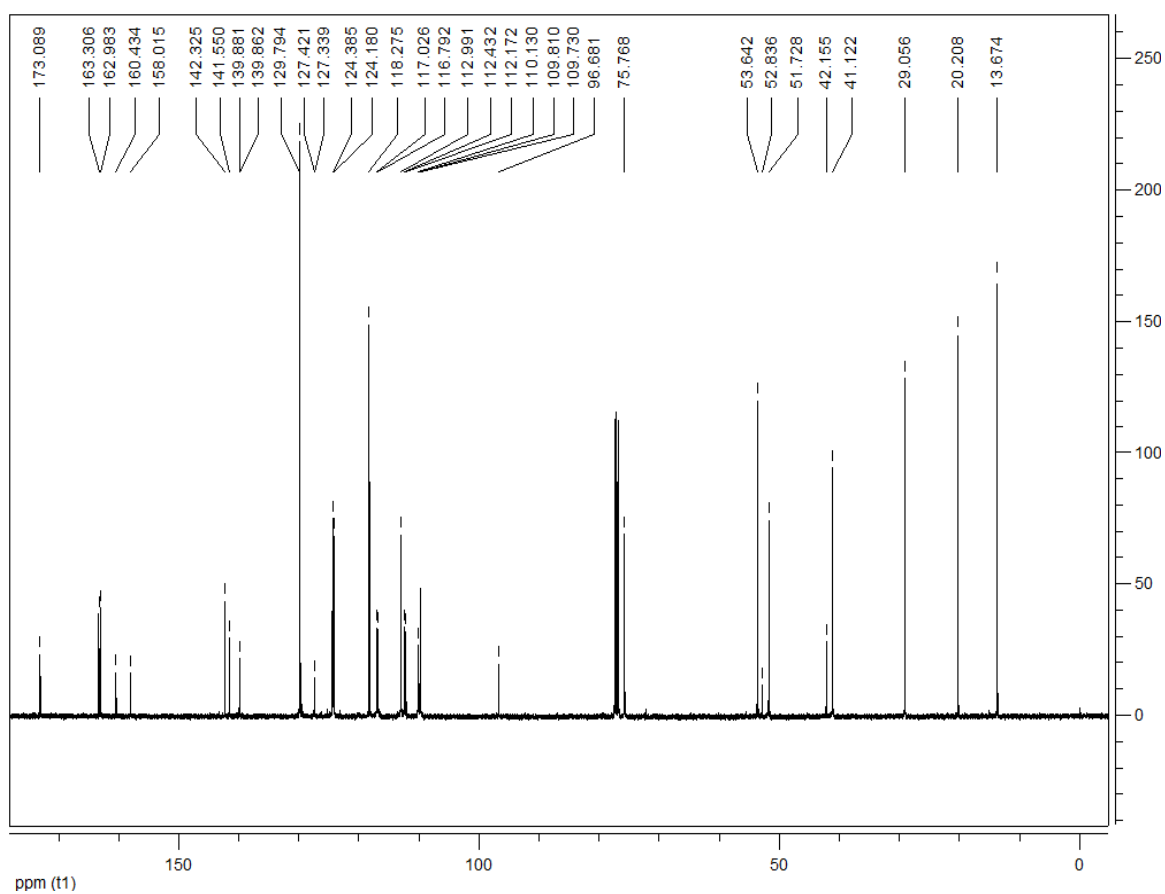

**Dimethyl 1'-butyl-8,8-dicyano-1,5'-dimethyl-2'-oxo-8,8a-dihydro-1H-spiro[imidazo[1,2-a]pyridine-7,3'-indoline]-5,6-dicarboxylate (1i):**

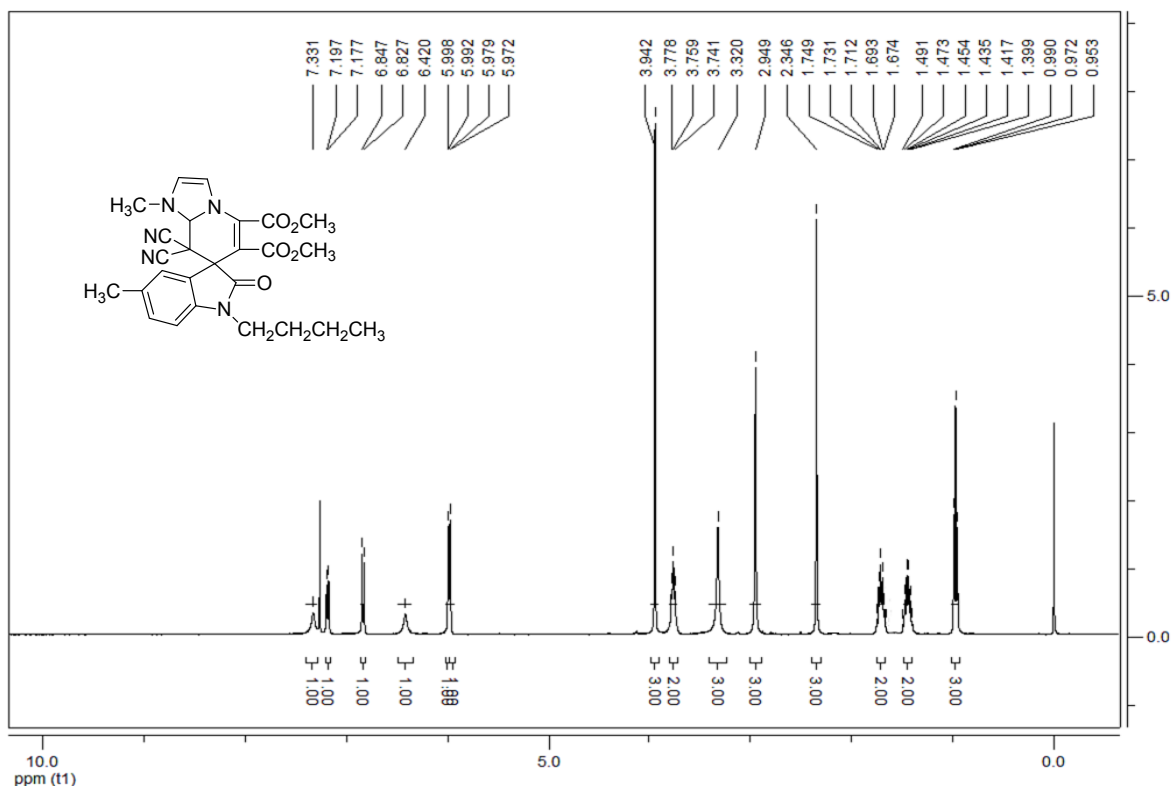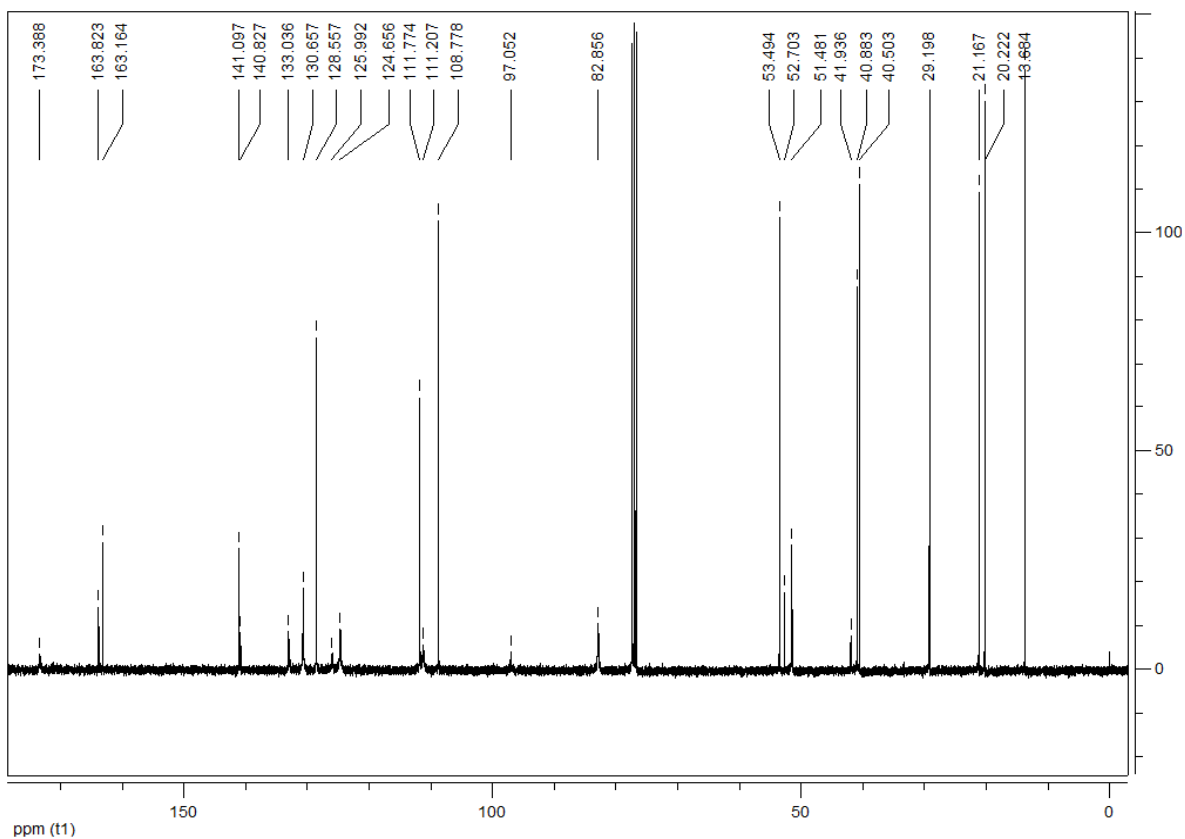

**Dimethyl 5'-chloro-8,8-dicyano-1-methyl-2'-oxo-1'-propyl-8,8a-dihydro-1H-spiro[imidazo[1,2-a]pyridine-7,3'-indoline]-5,6-dicarboxylate (1j):**

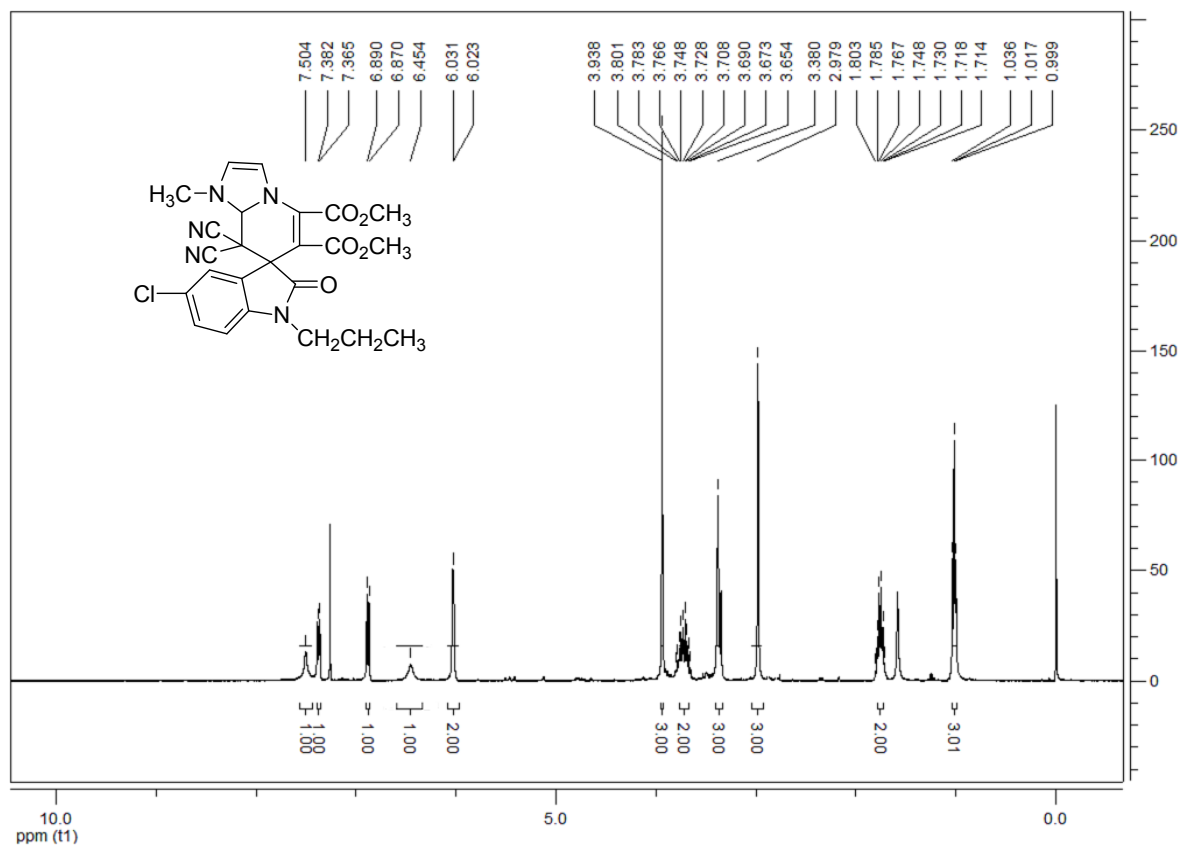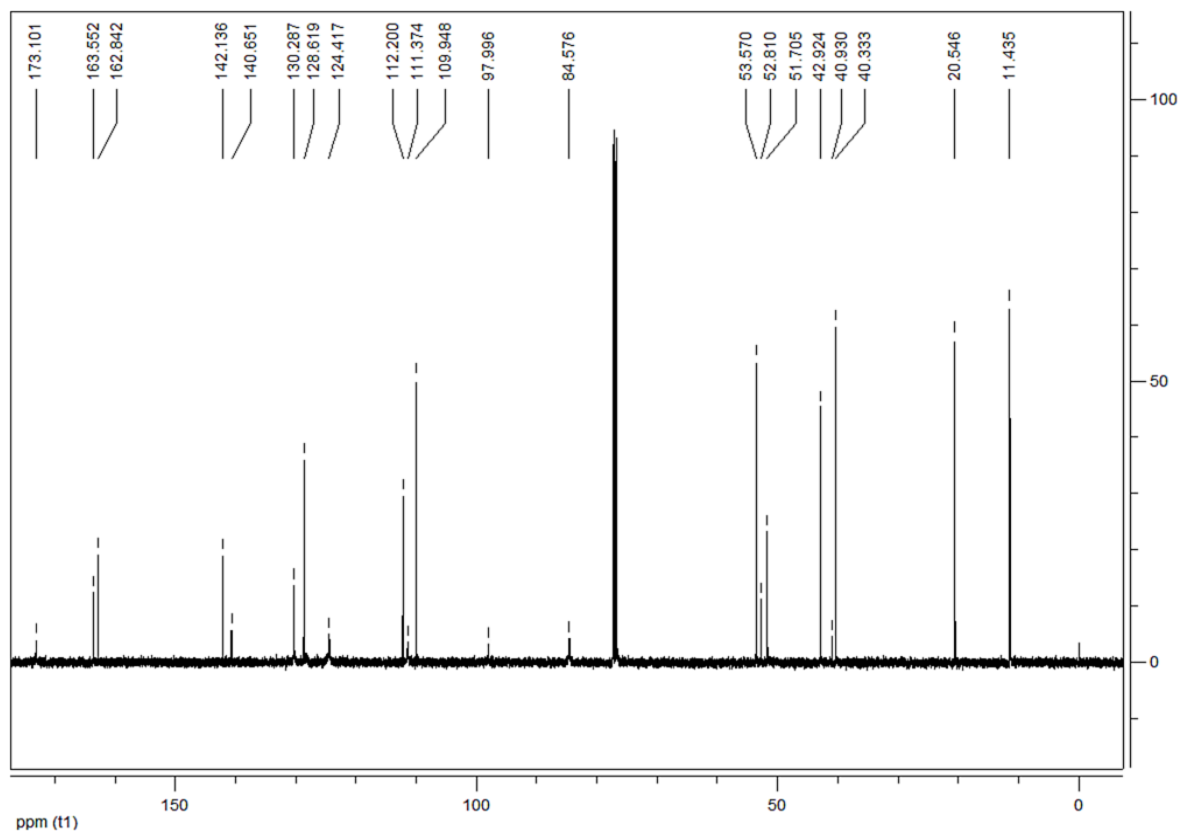

**Dimethyl 1'-butyl-8,8-dicyano-5'-fluoro-1-methyl-2'-oxo-8,8a-dihydro-1H-spiro[imidazo[1,2-a]pyridine-7,3'-indoline]-5,6-dicarboxylate (1k):**

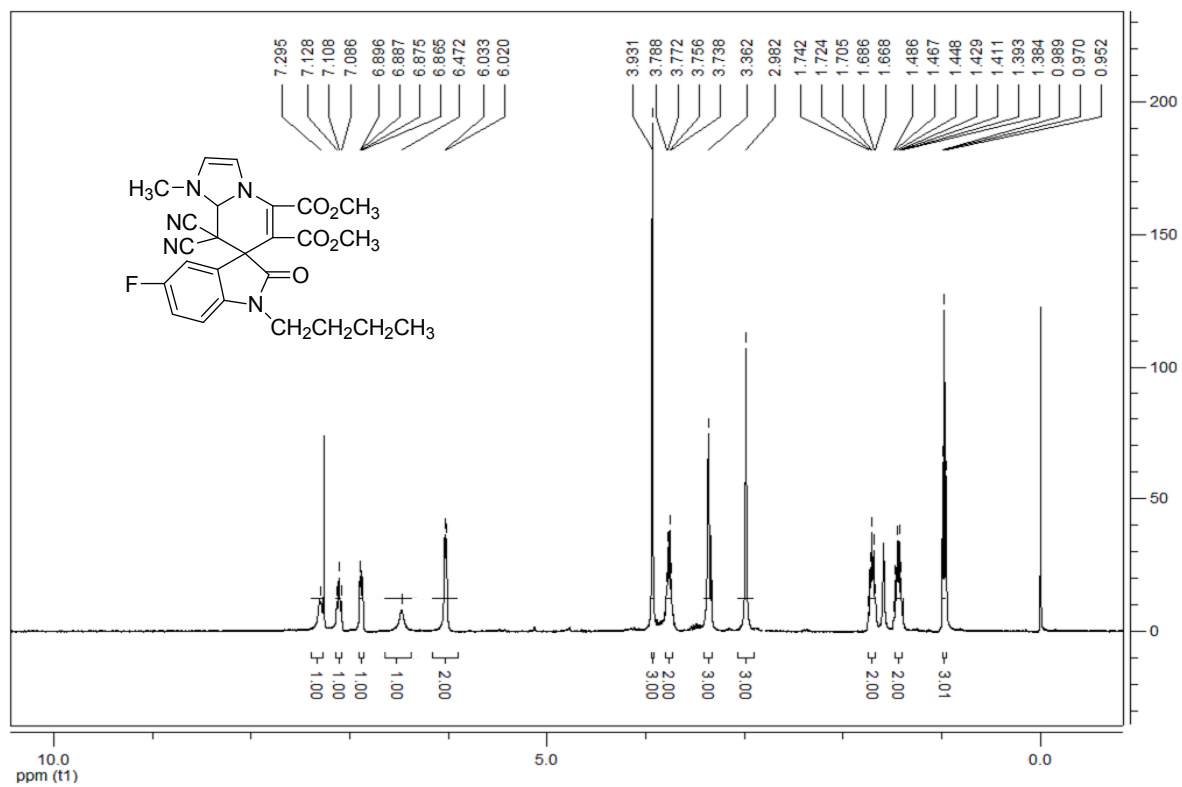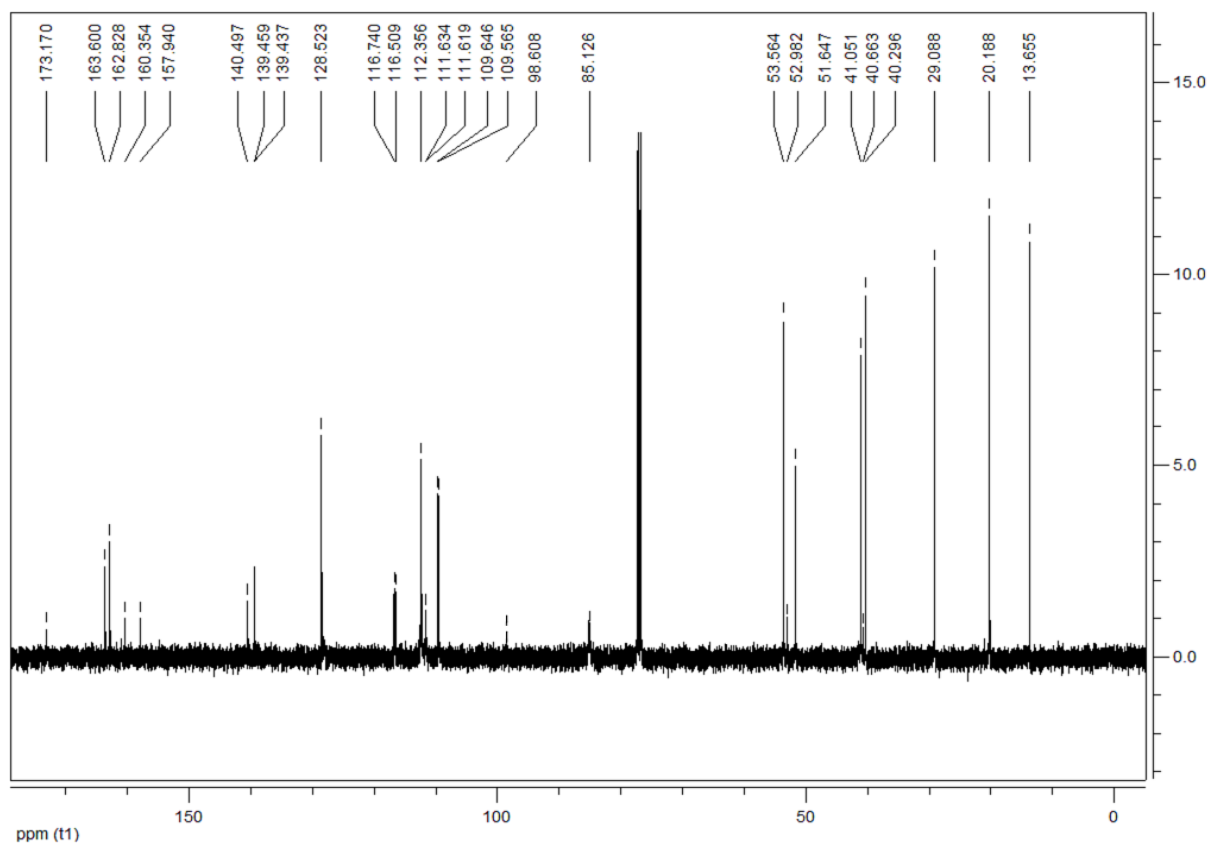

Dimethyl 1'-benzyl-1-butyl-8,8-dicyano-5'-methyl-2'-oxo-8,8a-dihydro-1H-spiro[imidazo[1,2-a]pyridine-7,3'-indoline]-5,6-dicarboxylate (11):

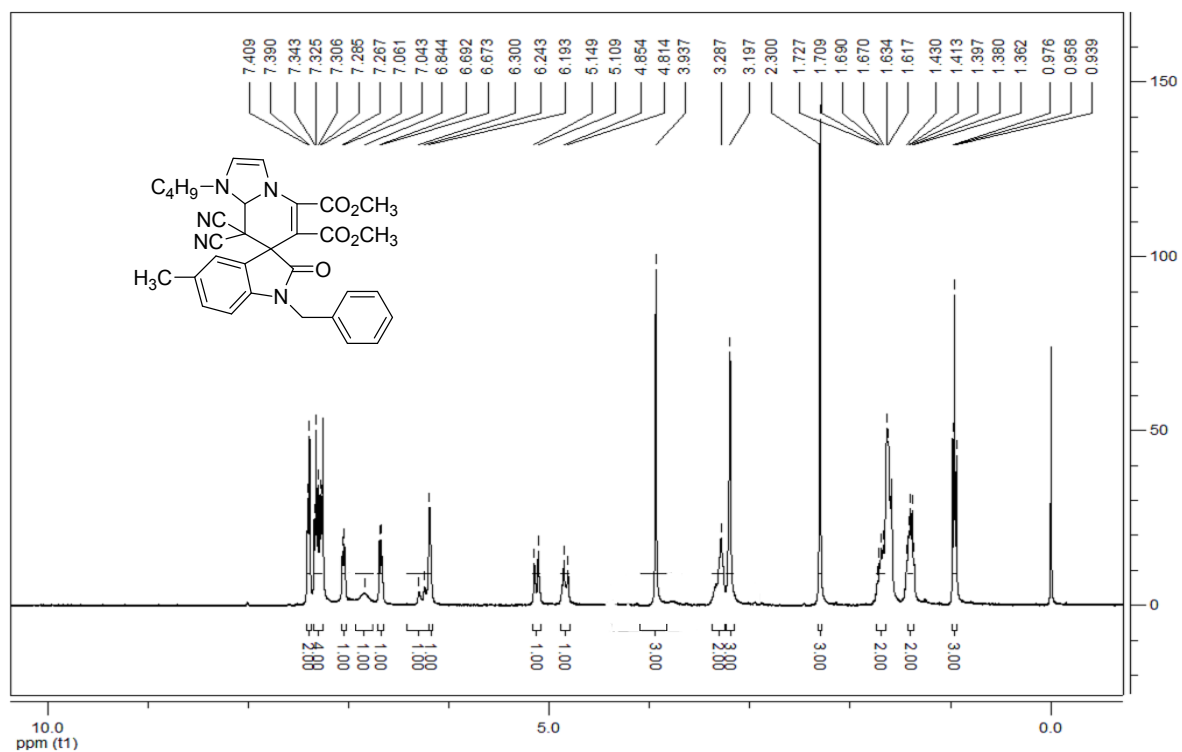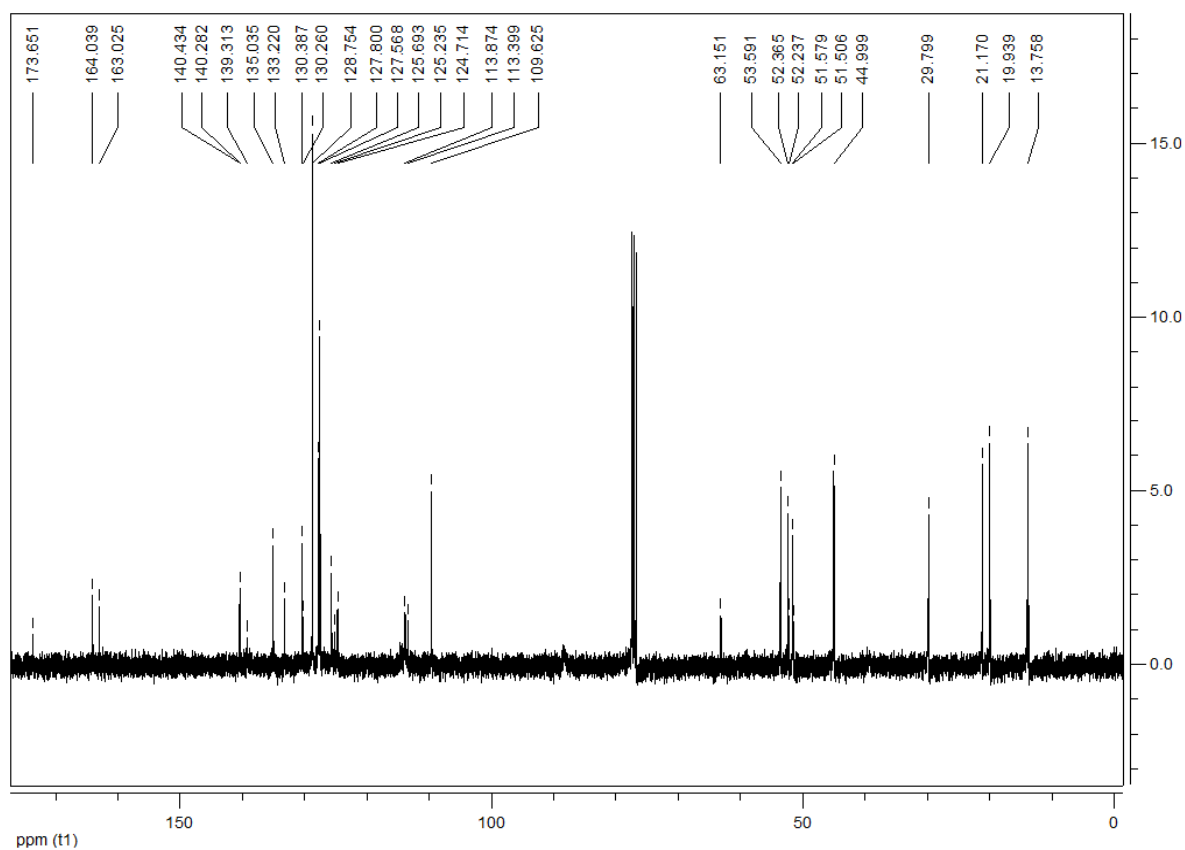

**8-Ethyl 5,6-dimethyl 1'-benzyl-8-cyano-2'-oxo-1-phenyl-8,8a-dihydro-1H-spiro[imidazo[1,2-a]pyridine-7,3'-indoline]-5,6,8-tricarboxylate (1m):**

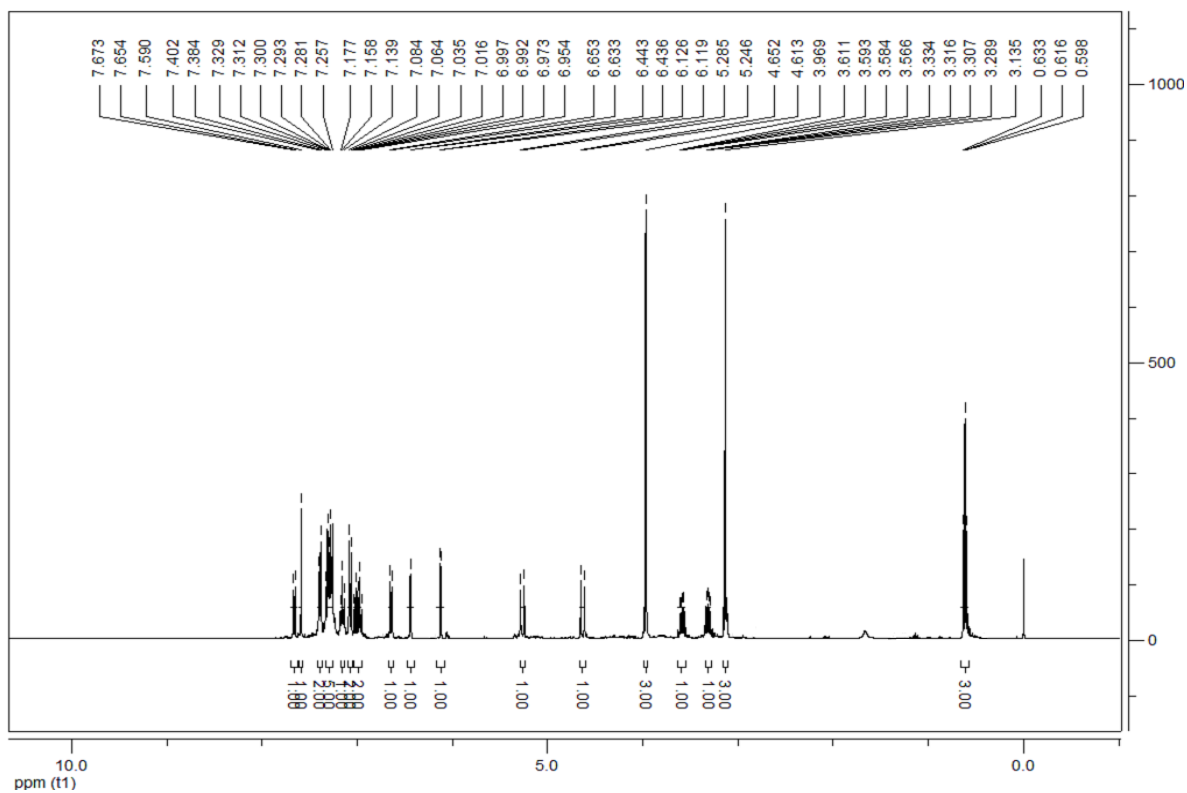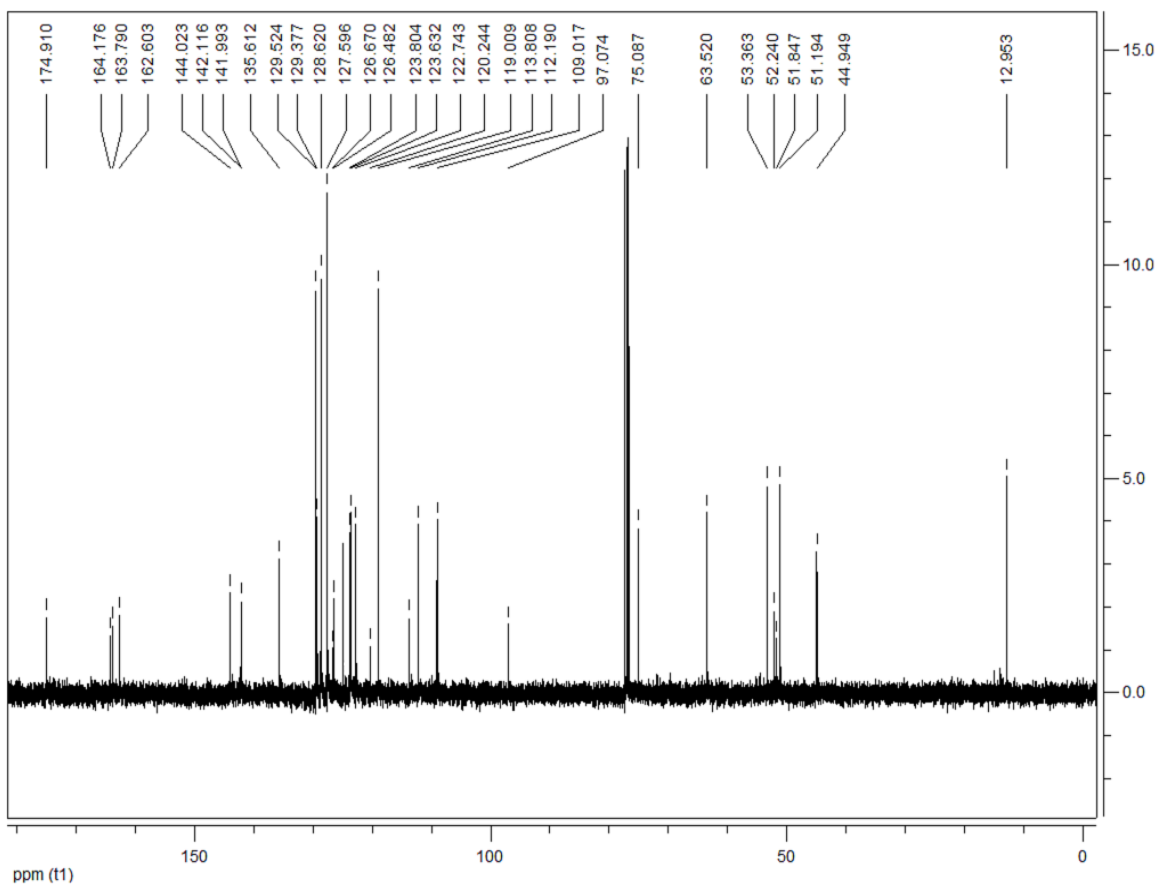

**8-Ethyl 5,6-dimethyl 5'-chloro-8-cyano-2'-oxo-1-phenyl-1'-propyl-8,8a-dihydro-1H-spiro[imidazo[1,2-a]pyridine-7,3'-indoline]-5,6,8-tricarboxylate (1n):**

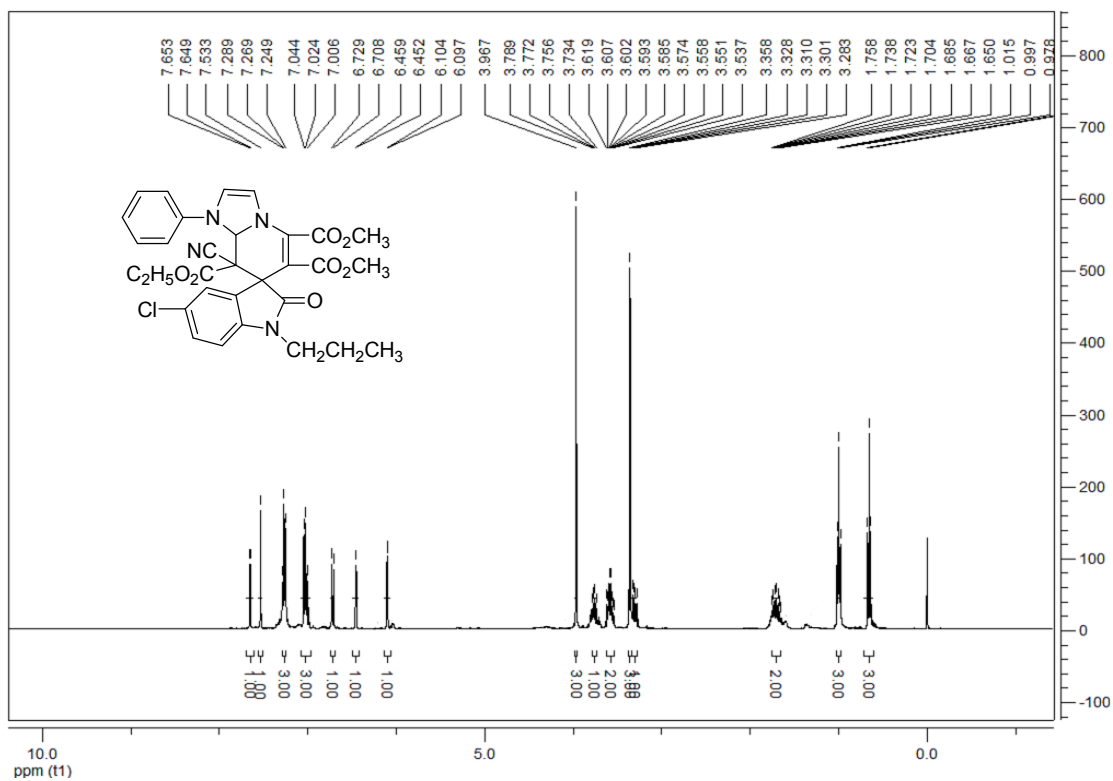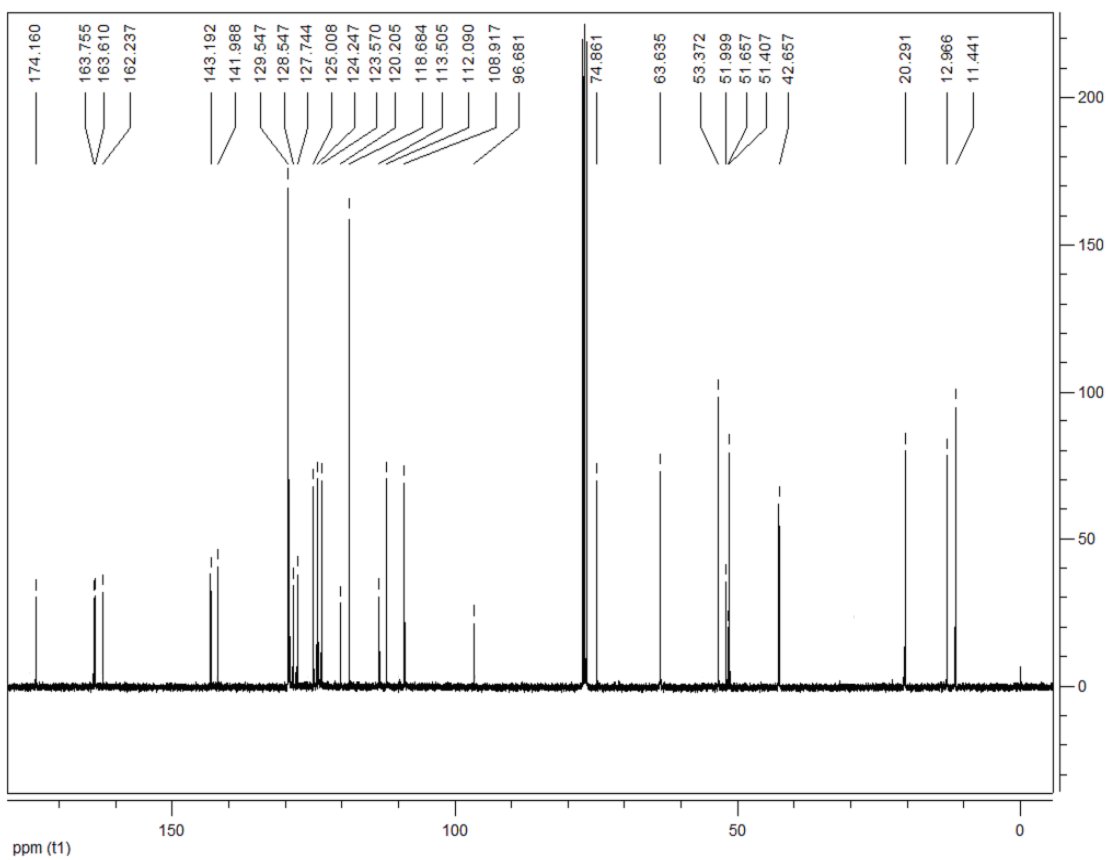

Compounds 2a/2a':

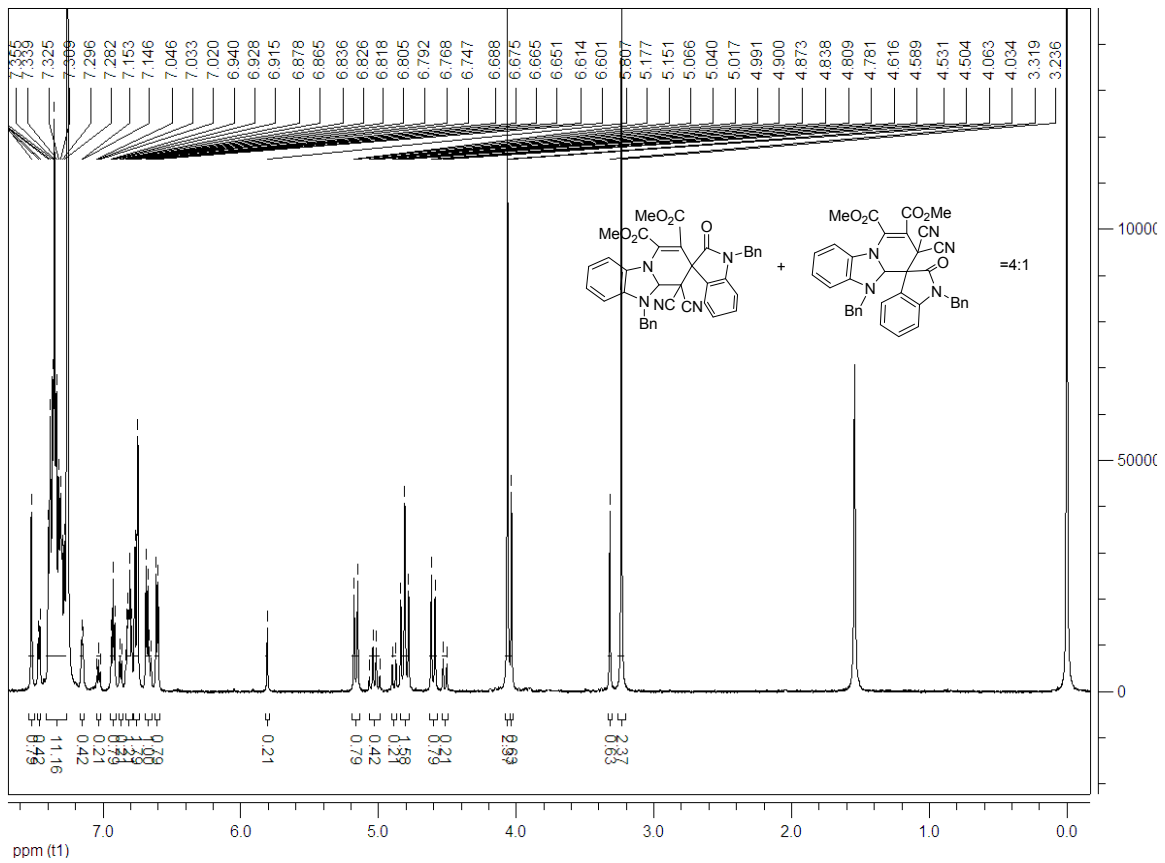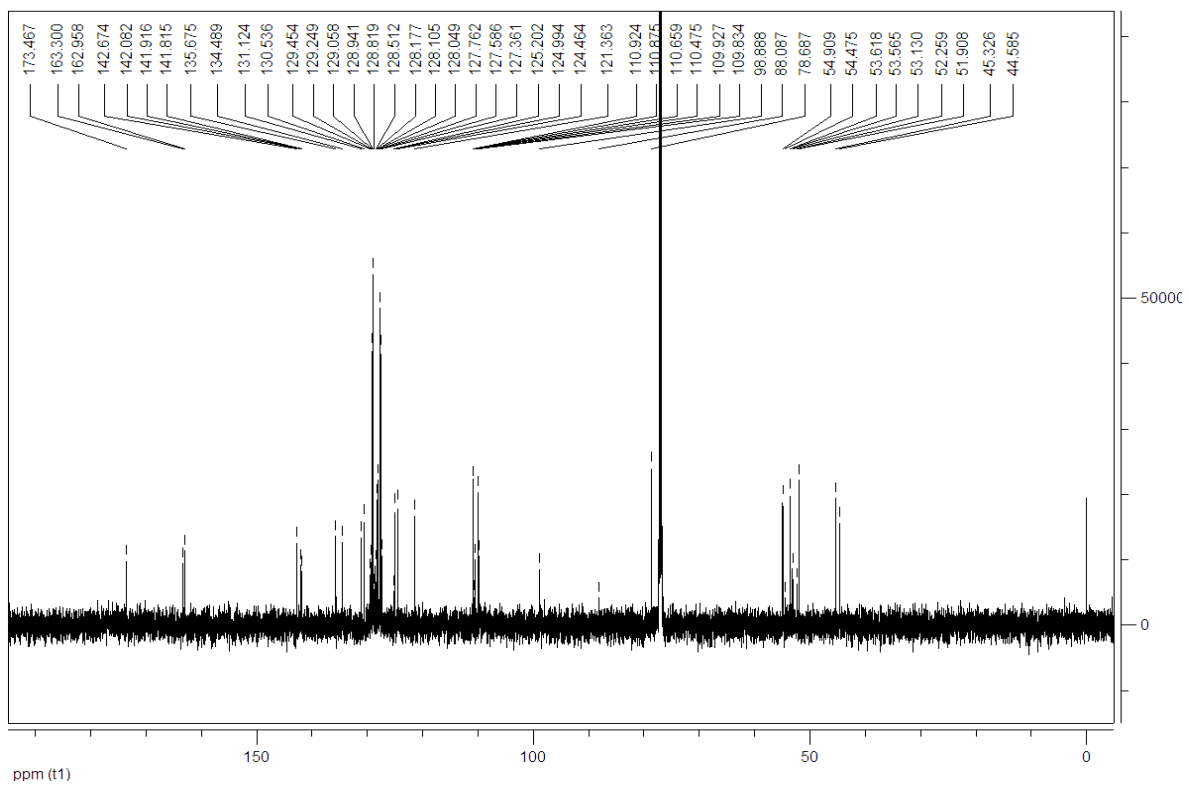

**Compounds 2b/2b':**



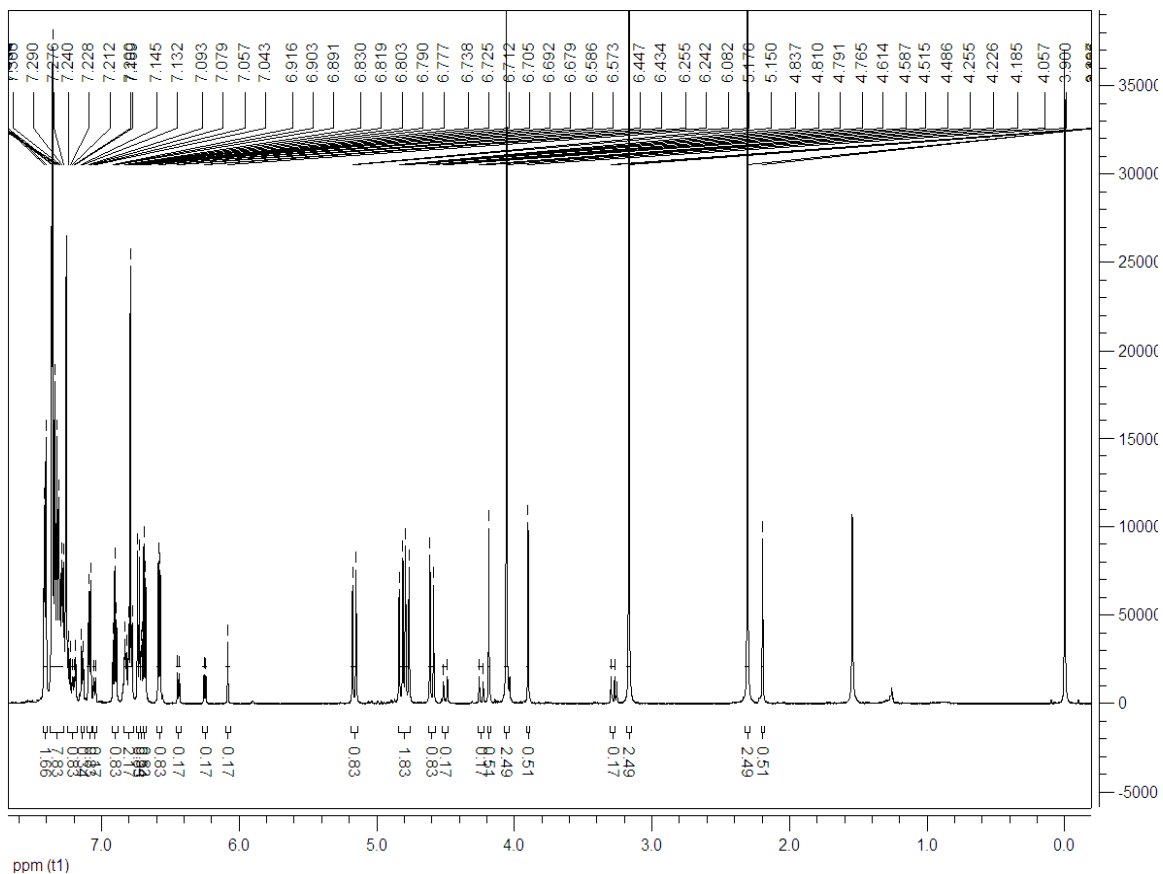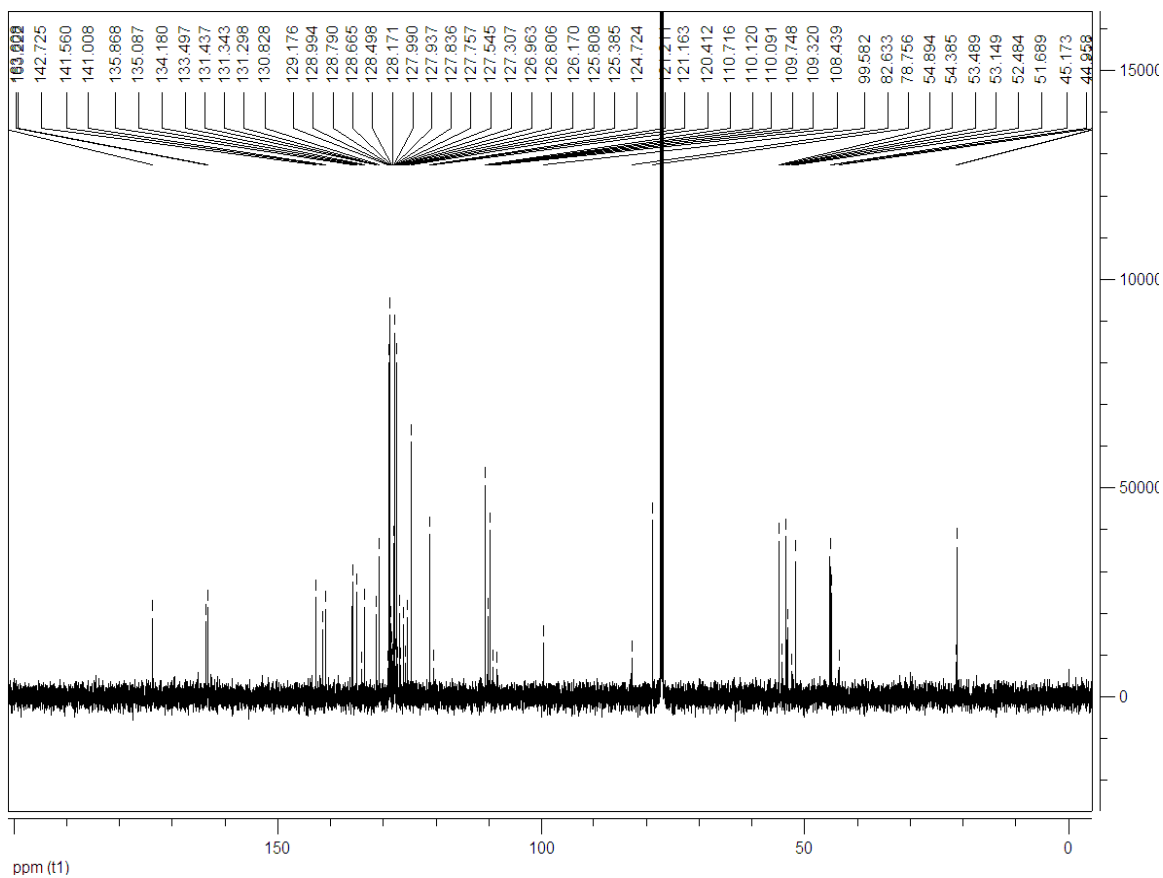

**Compounds 2c/2c':**

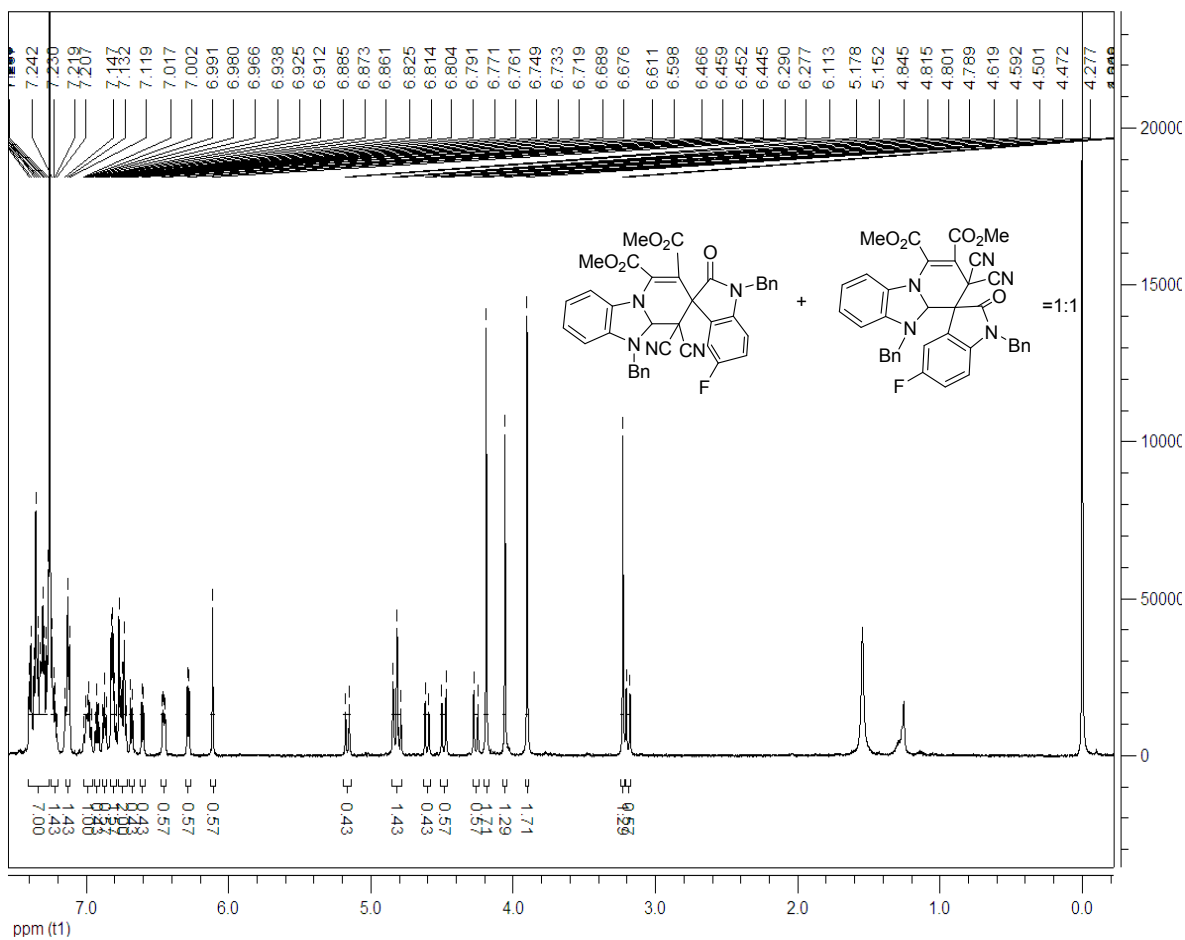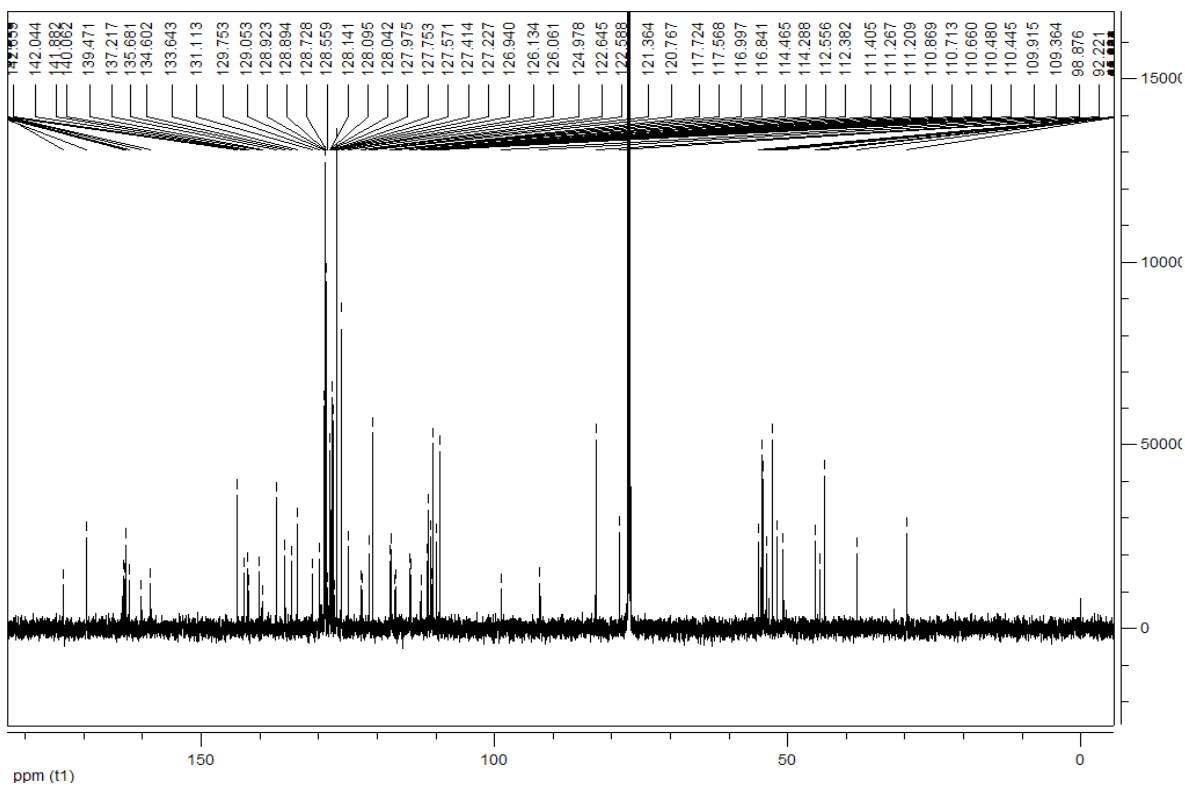

Compounds 2d/2d':

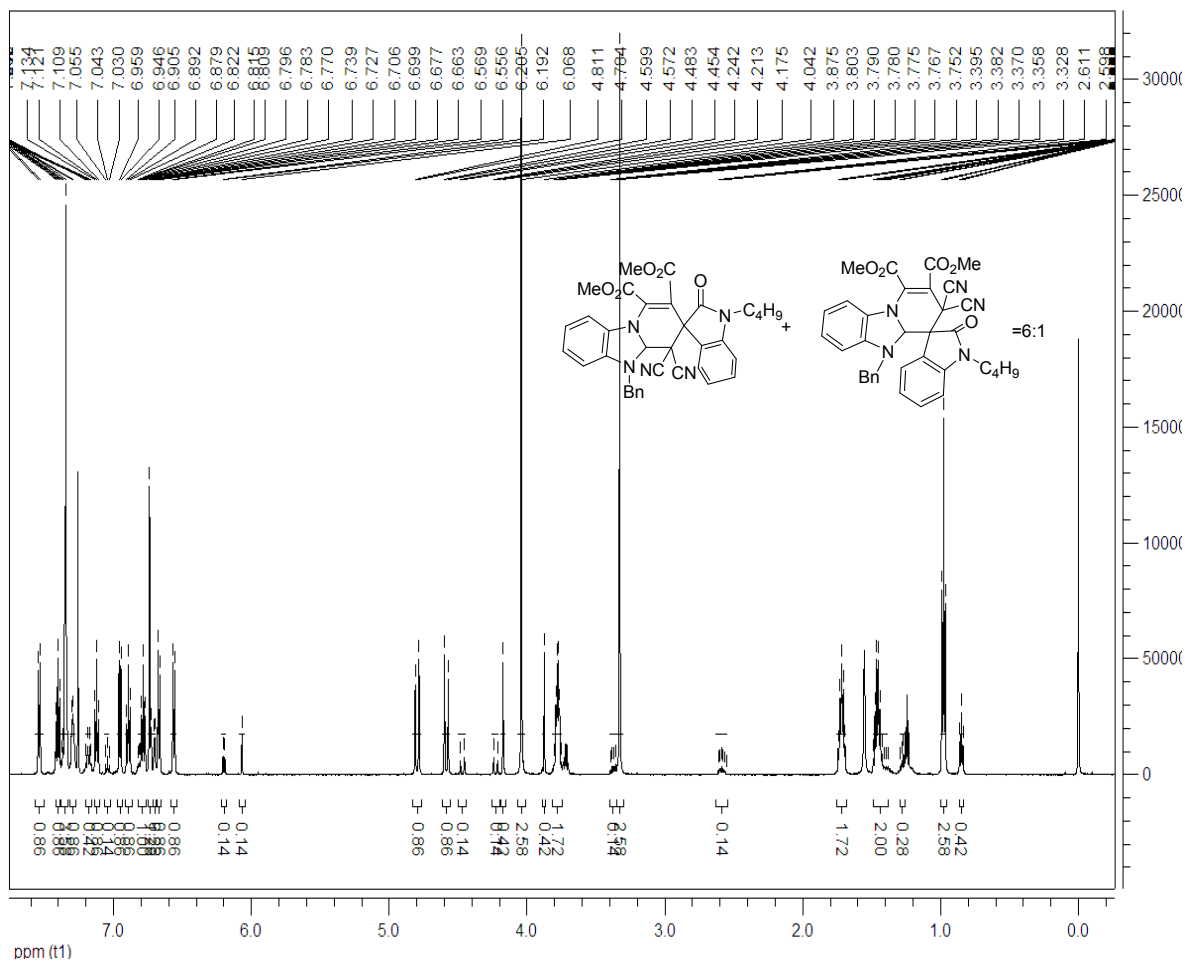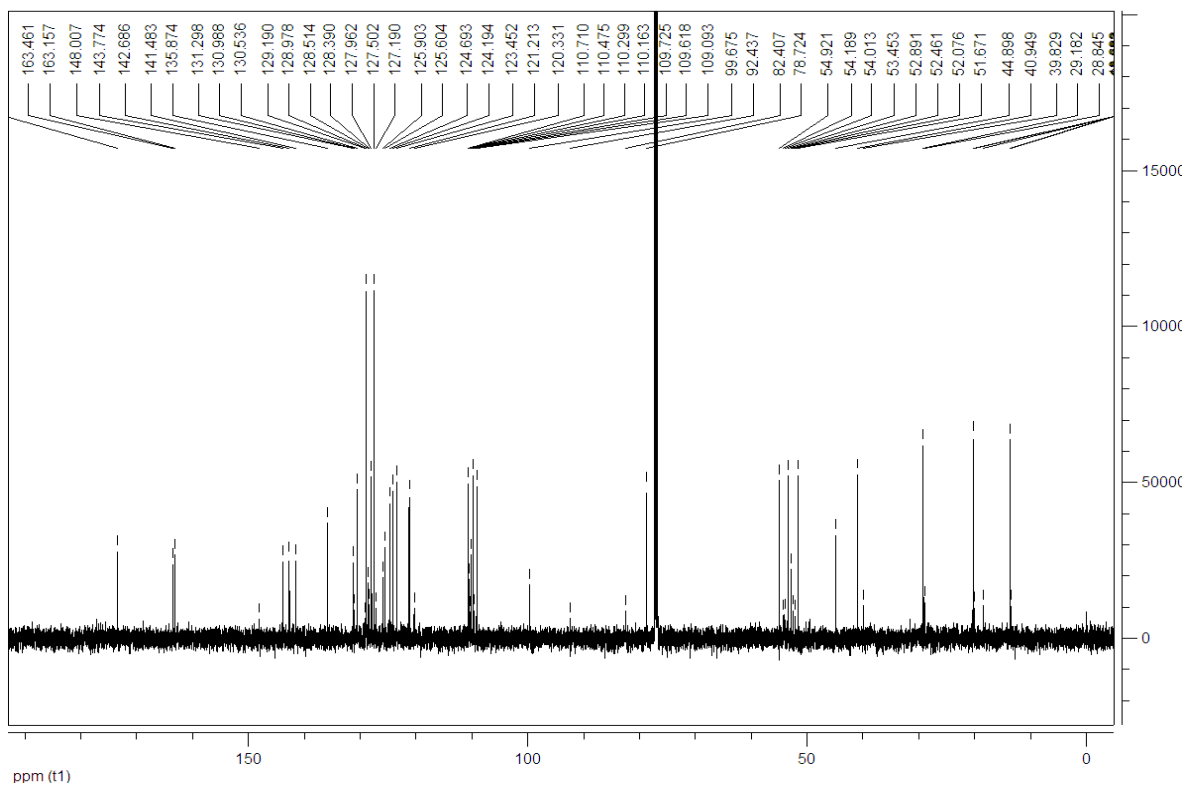

Compounds 2e/2e':

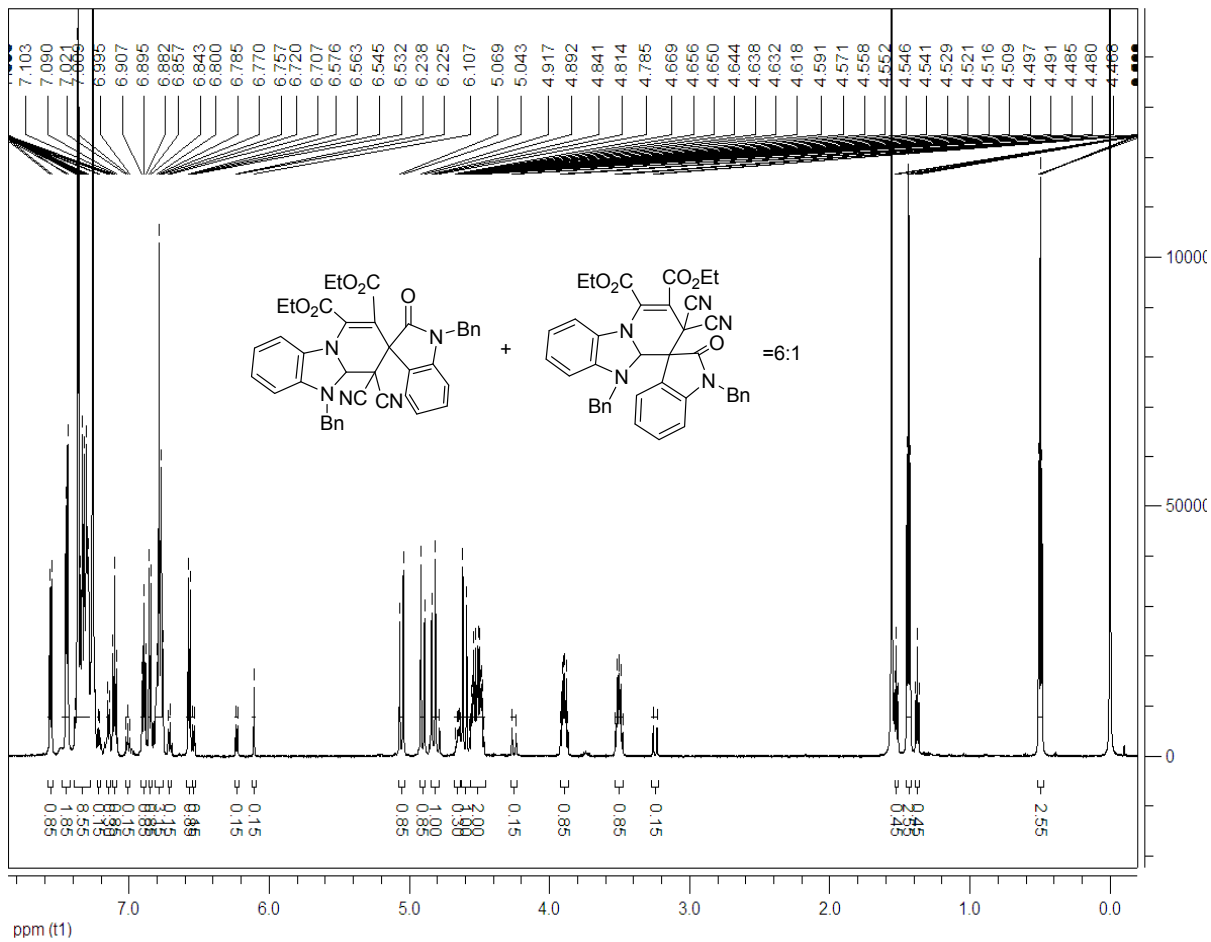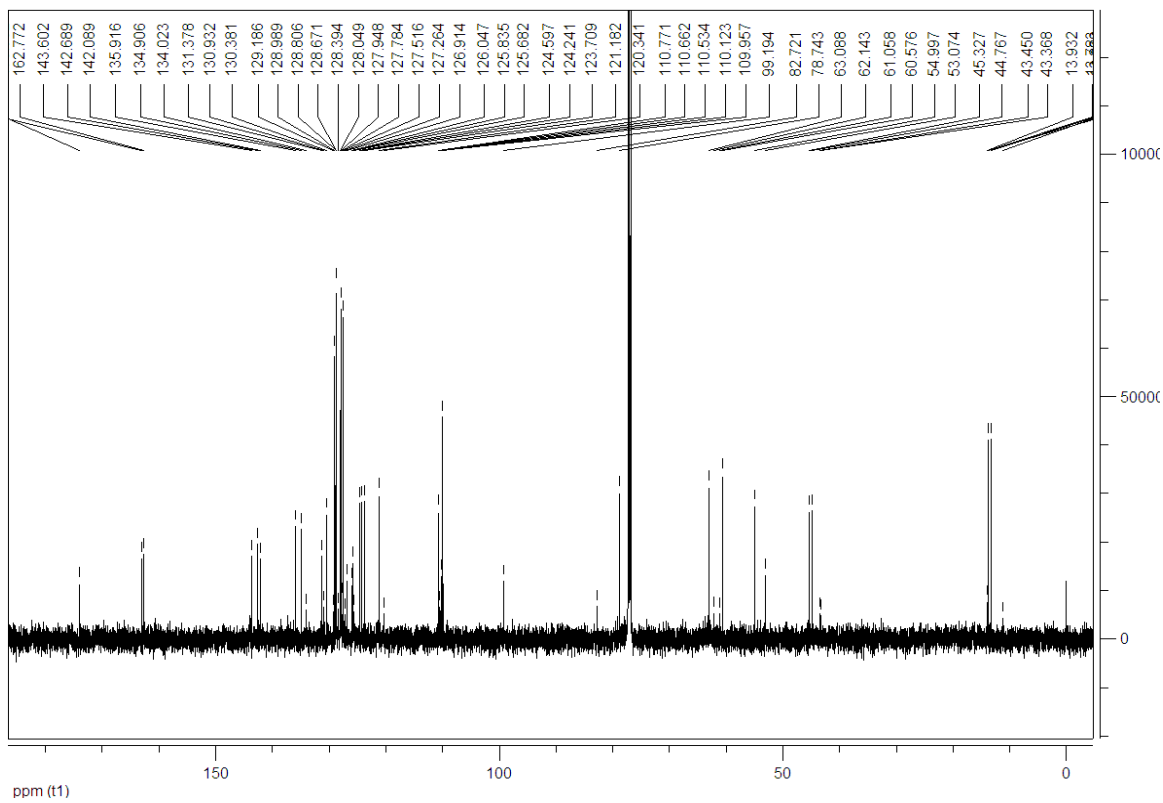

Compounds 2f/2f':

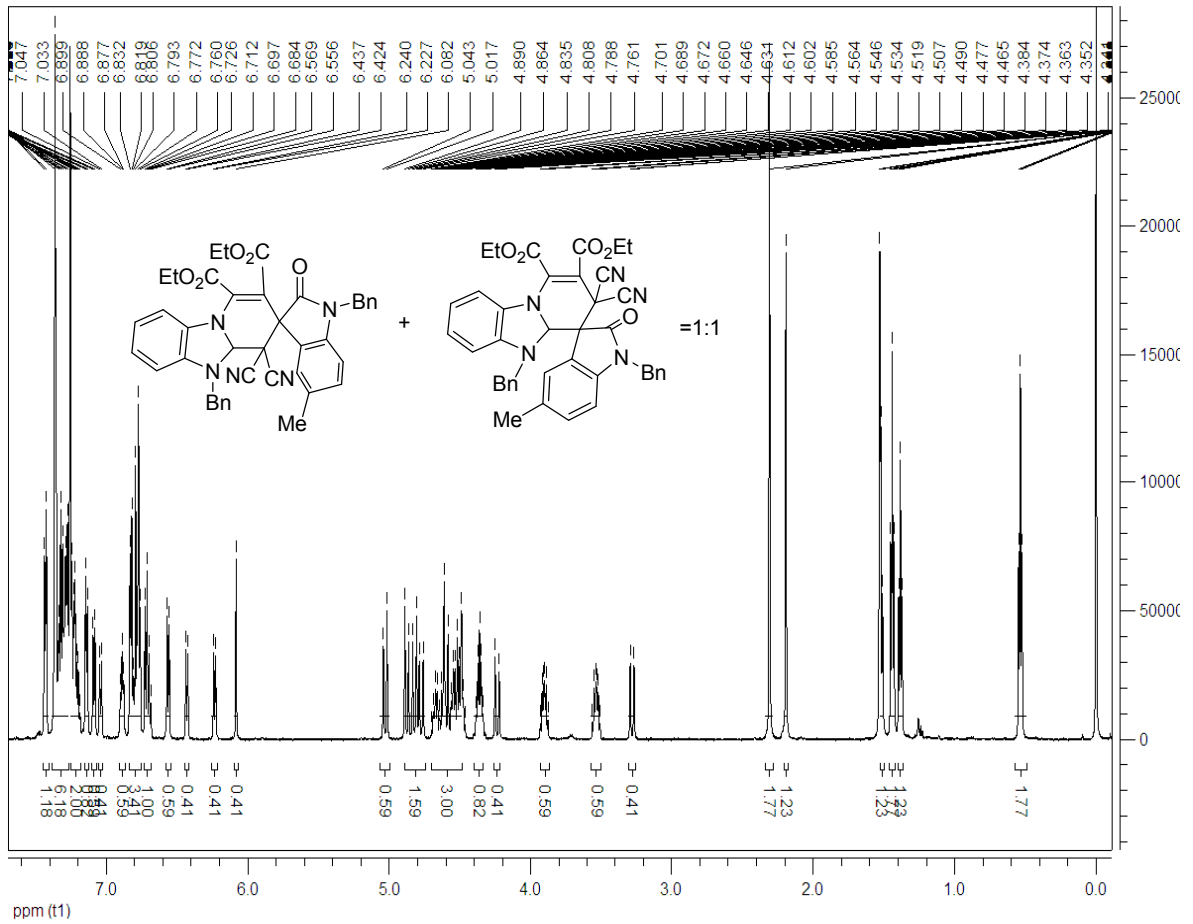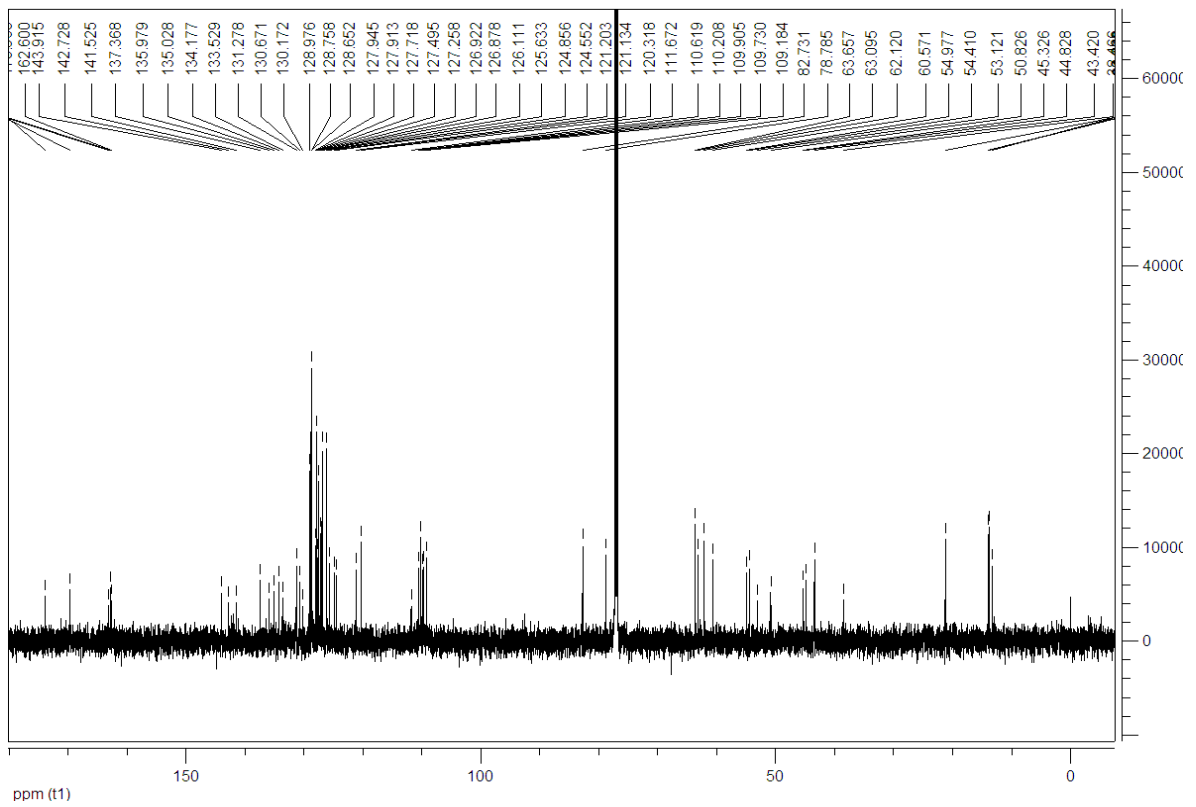

Compounds 2g/2g':

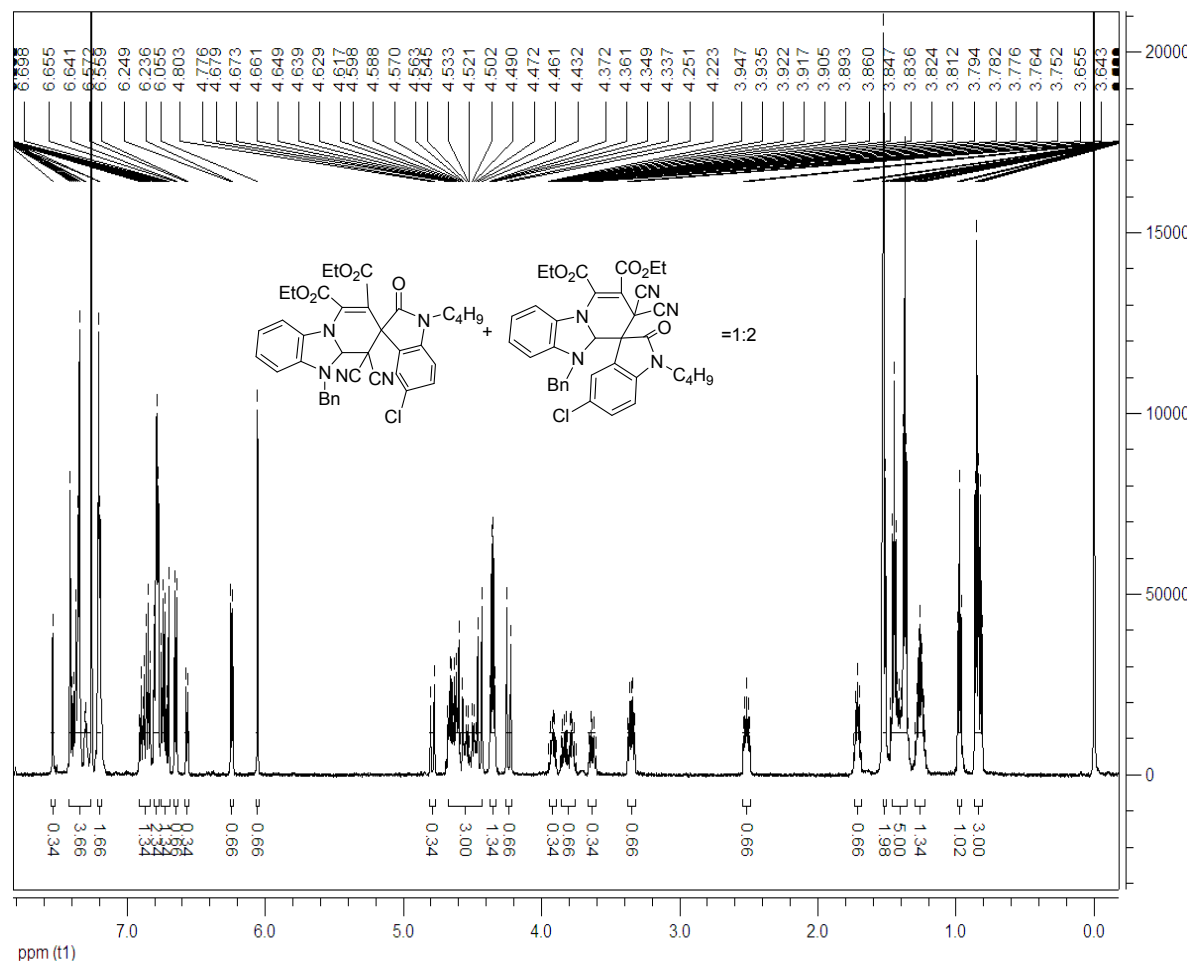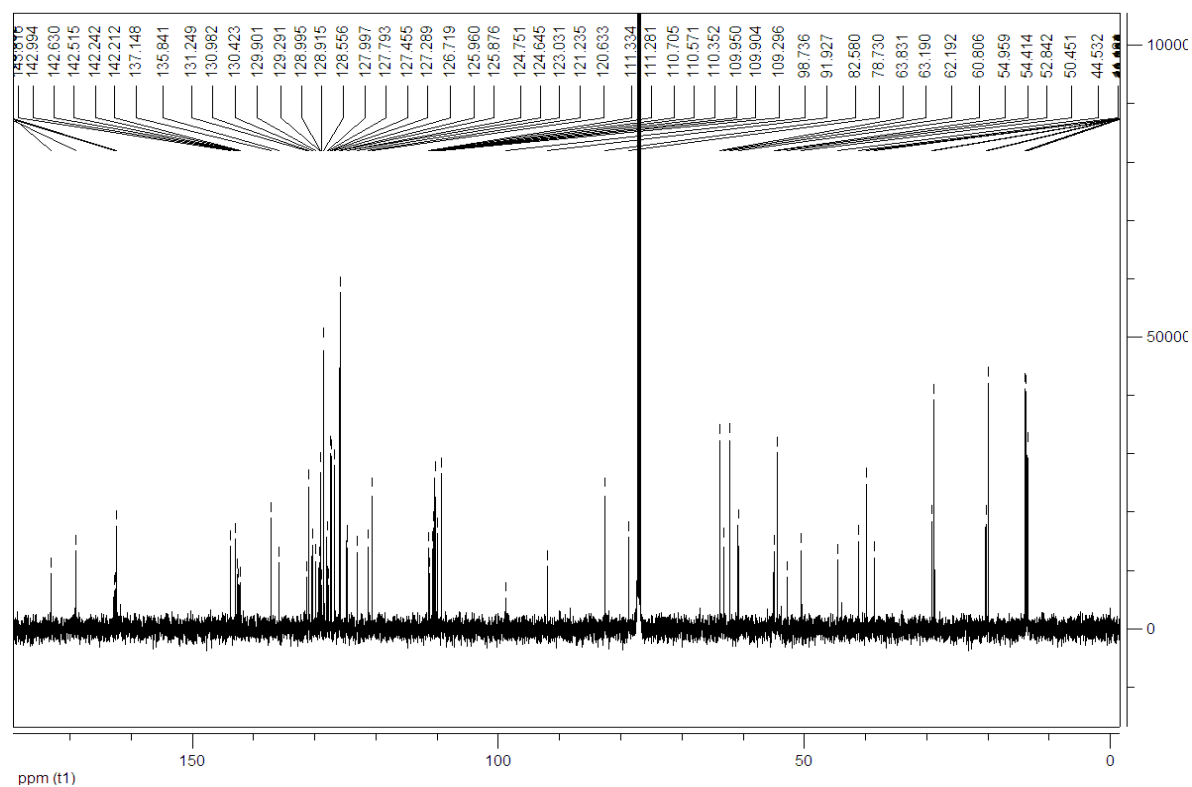

Compounds 2h/2h':

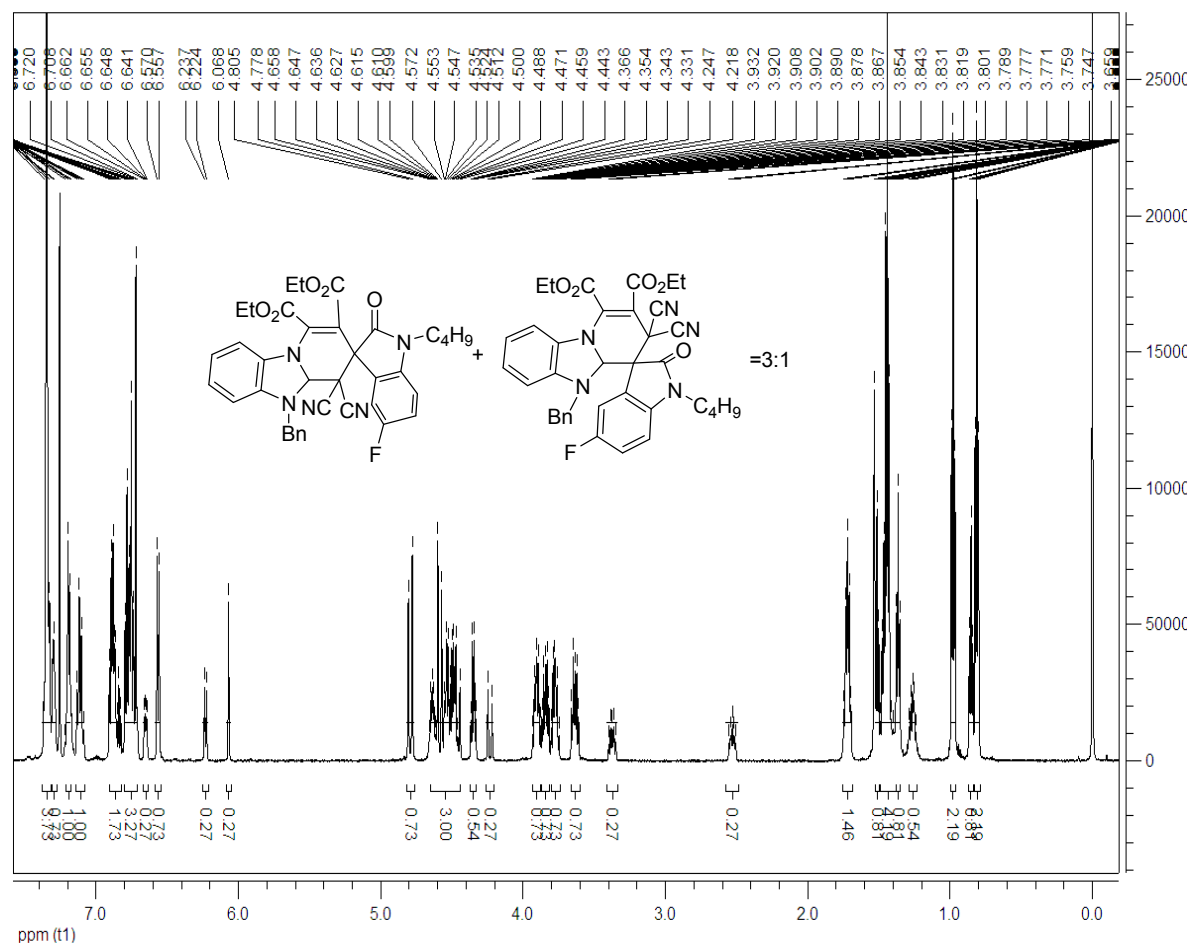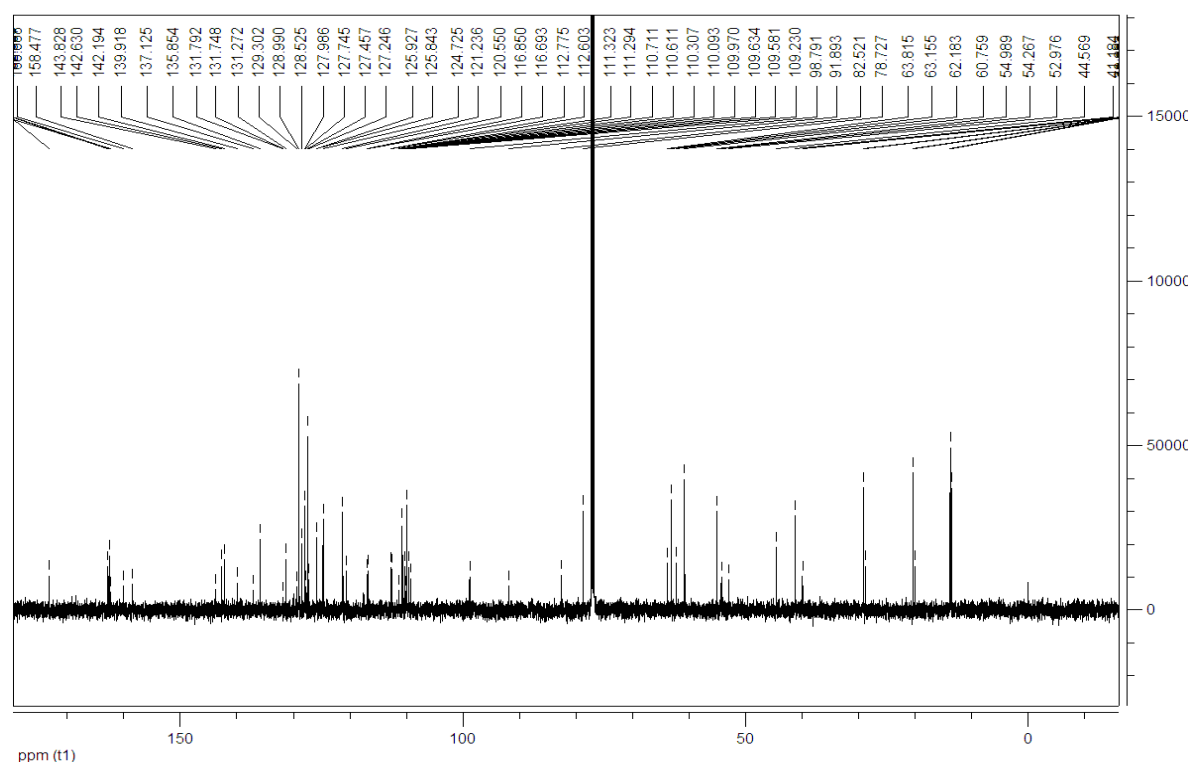

**Compounds 2i/2i':**

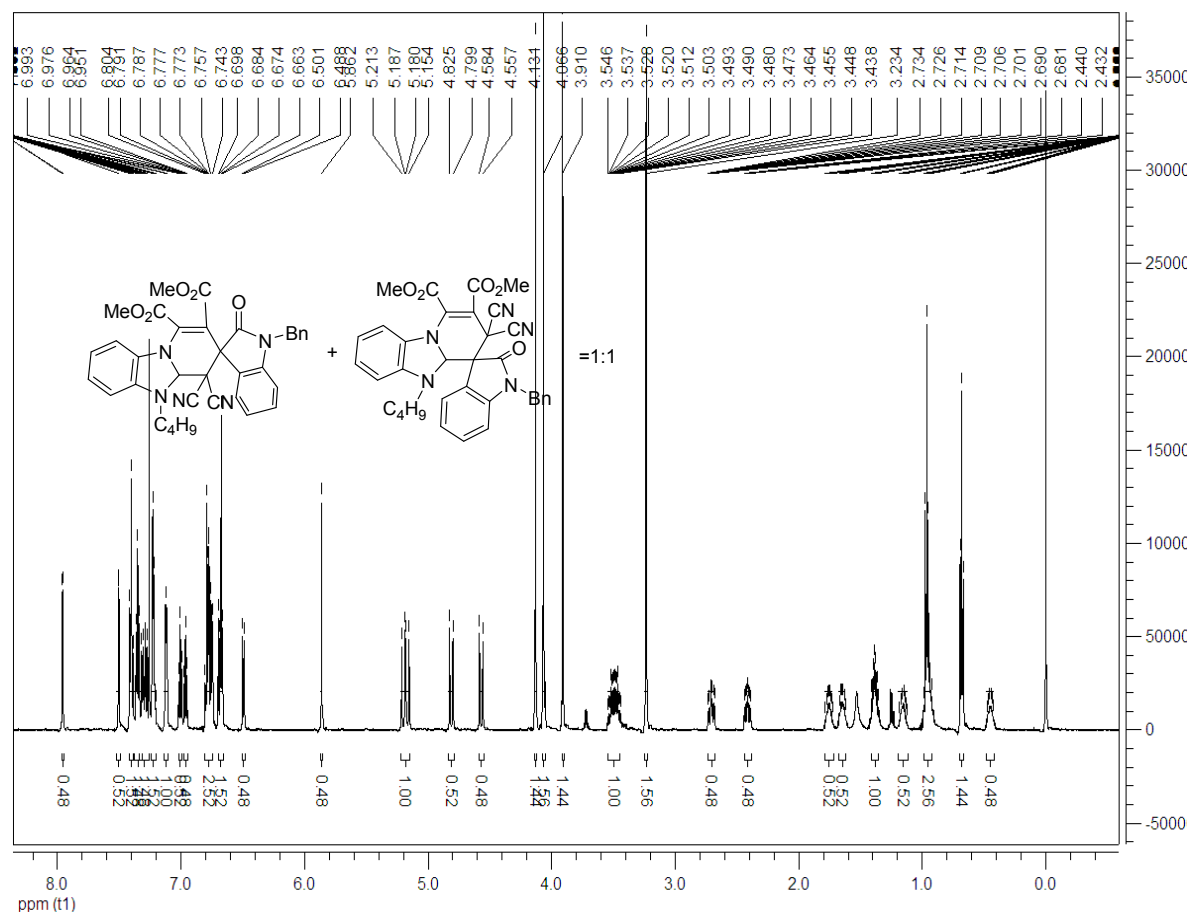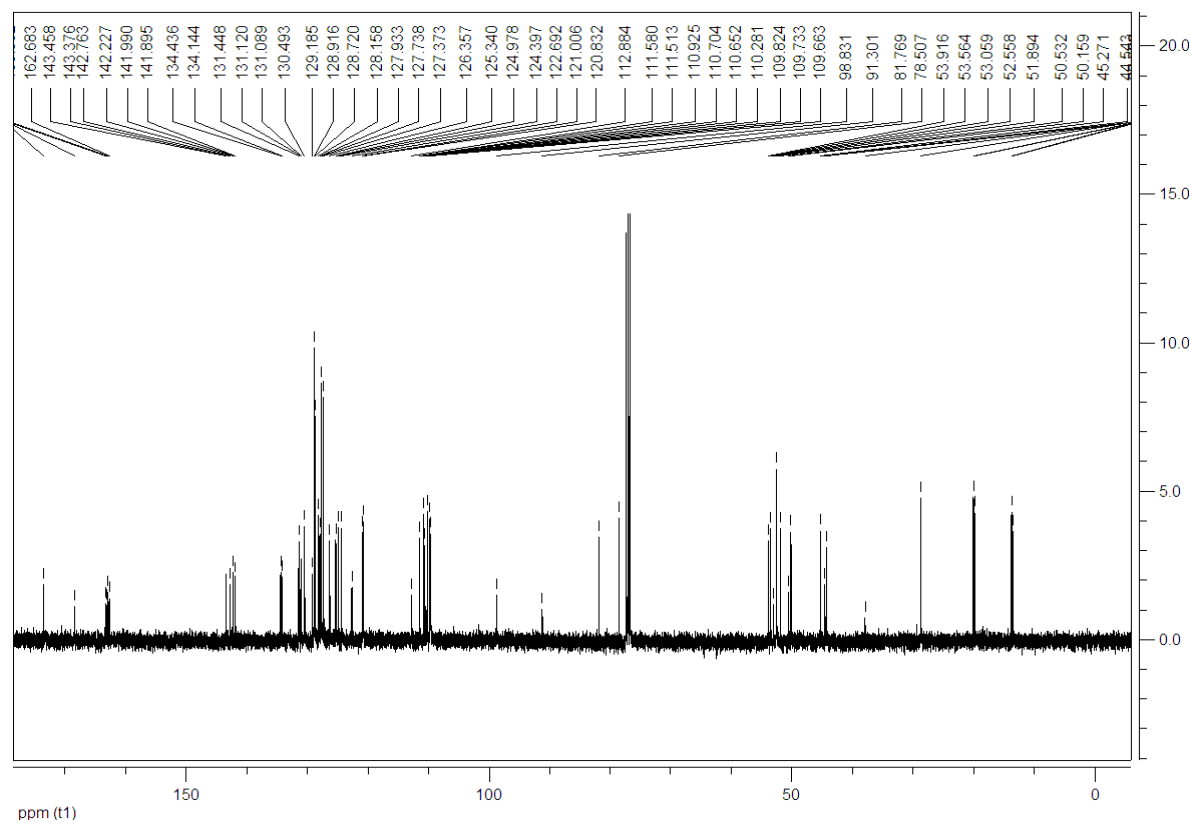



Compounds 2j/2j':

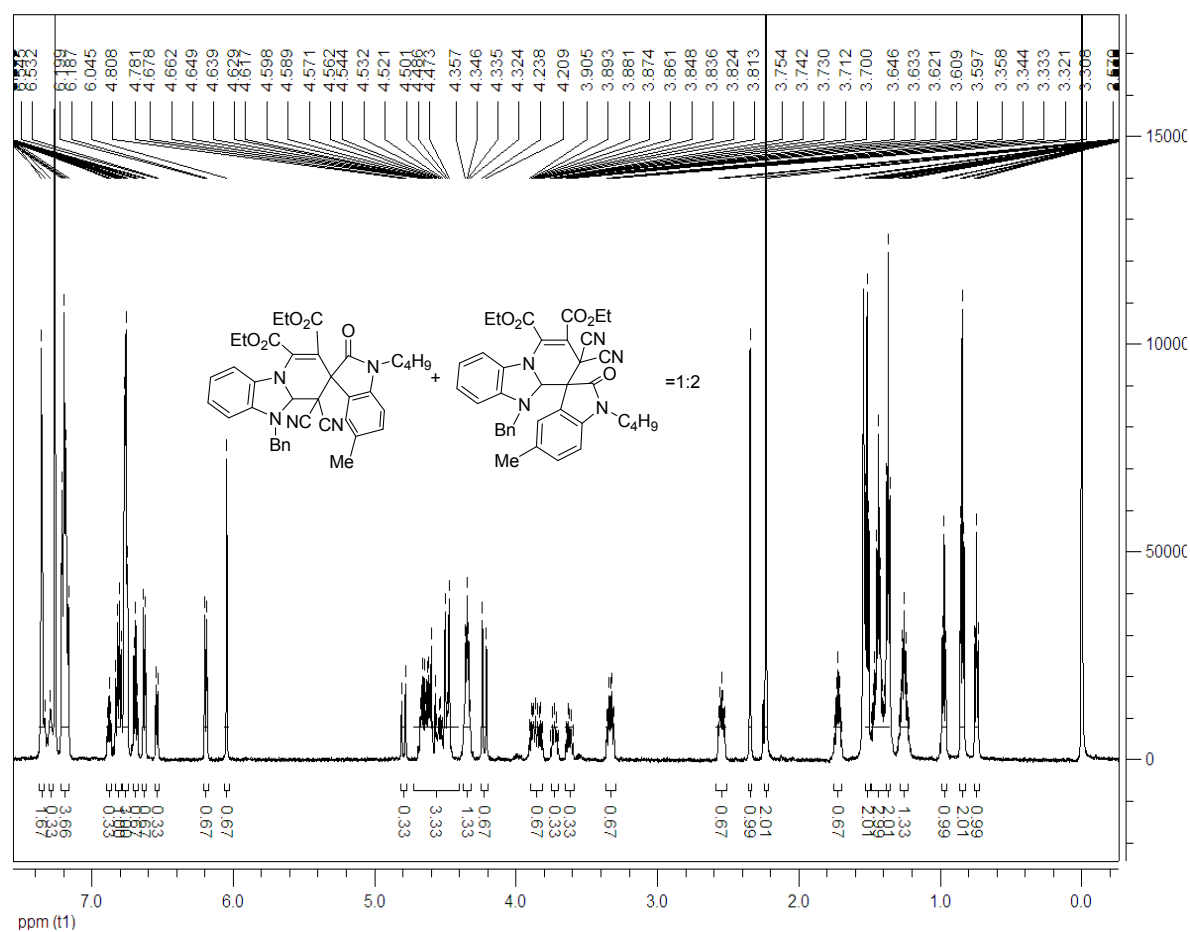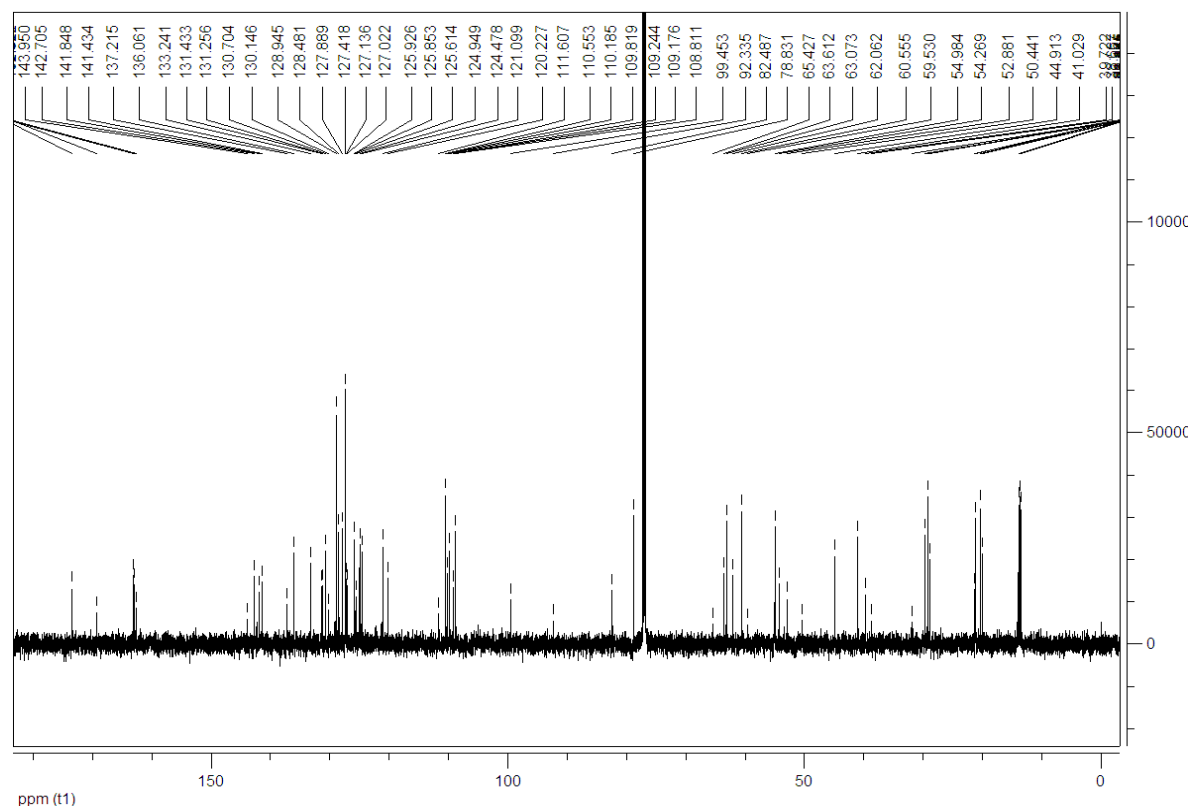

### Compound 2k:

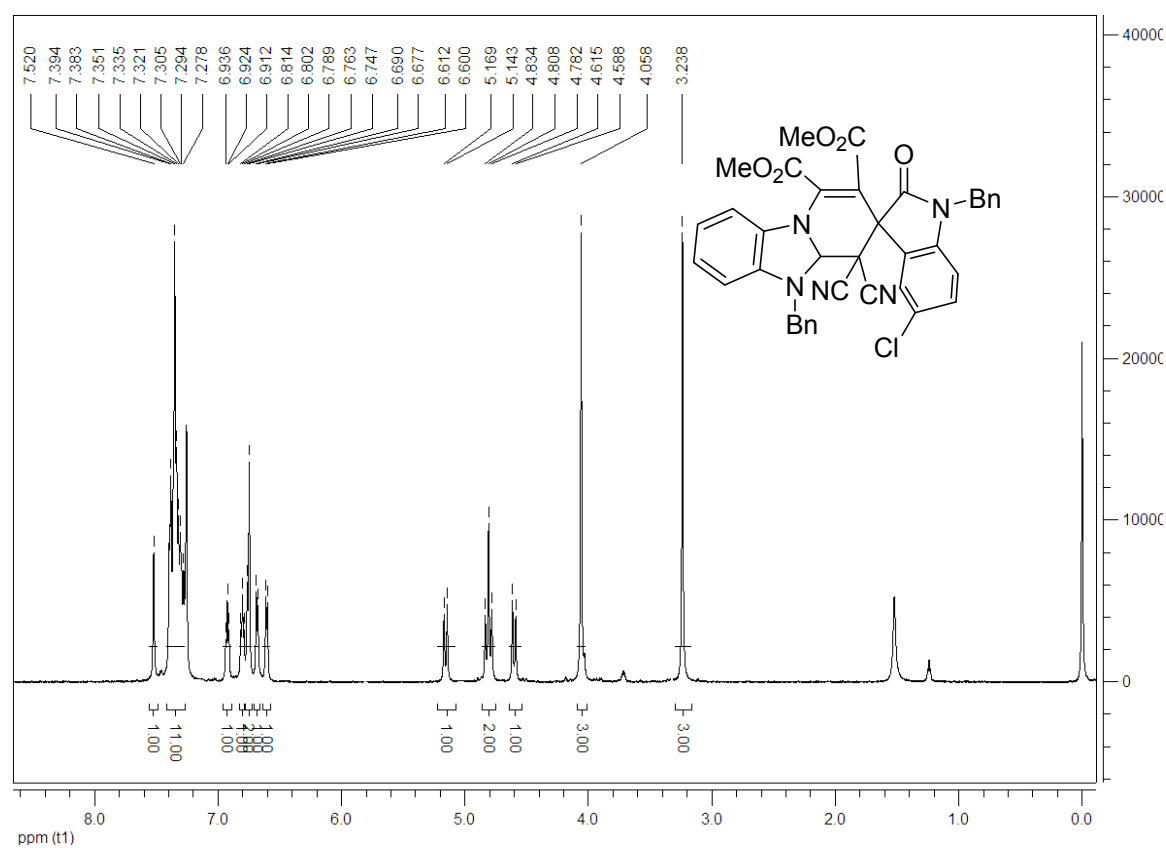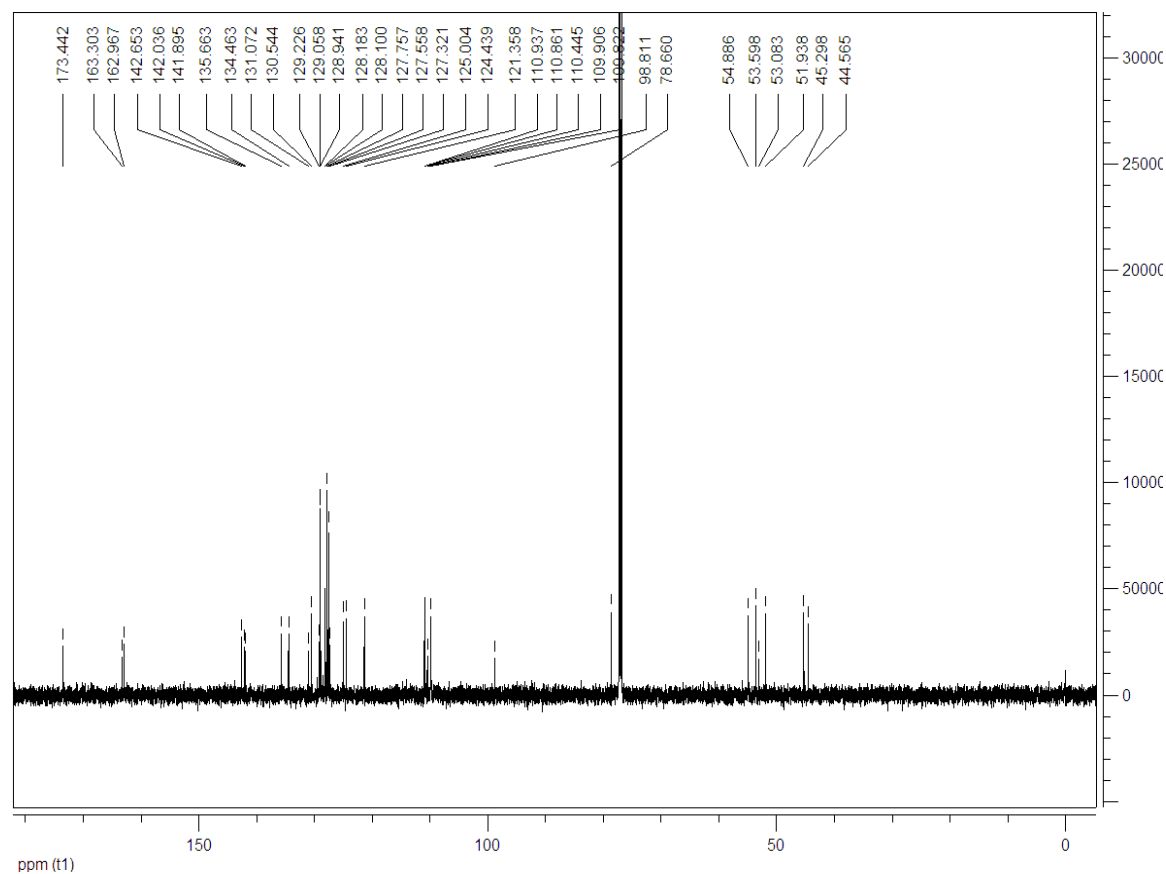

**Compound 2l:**

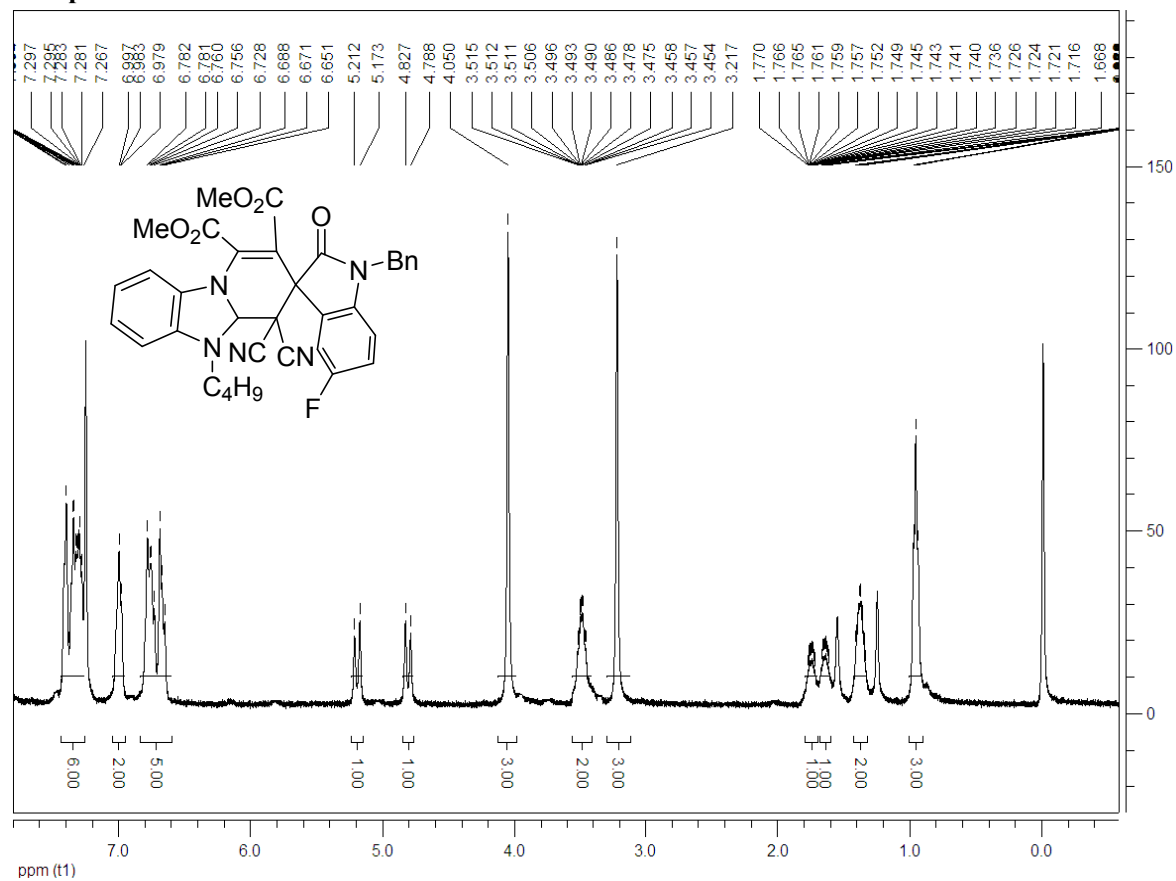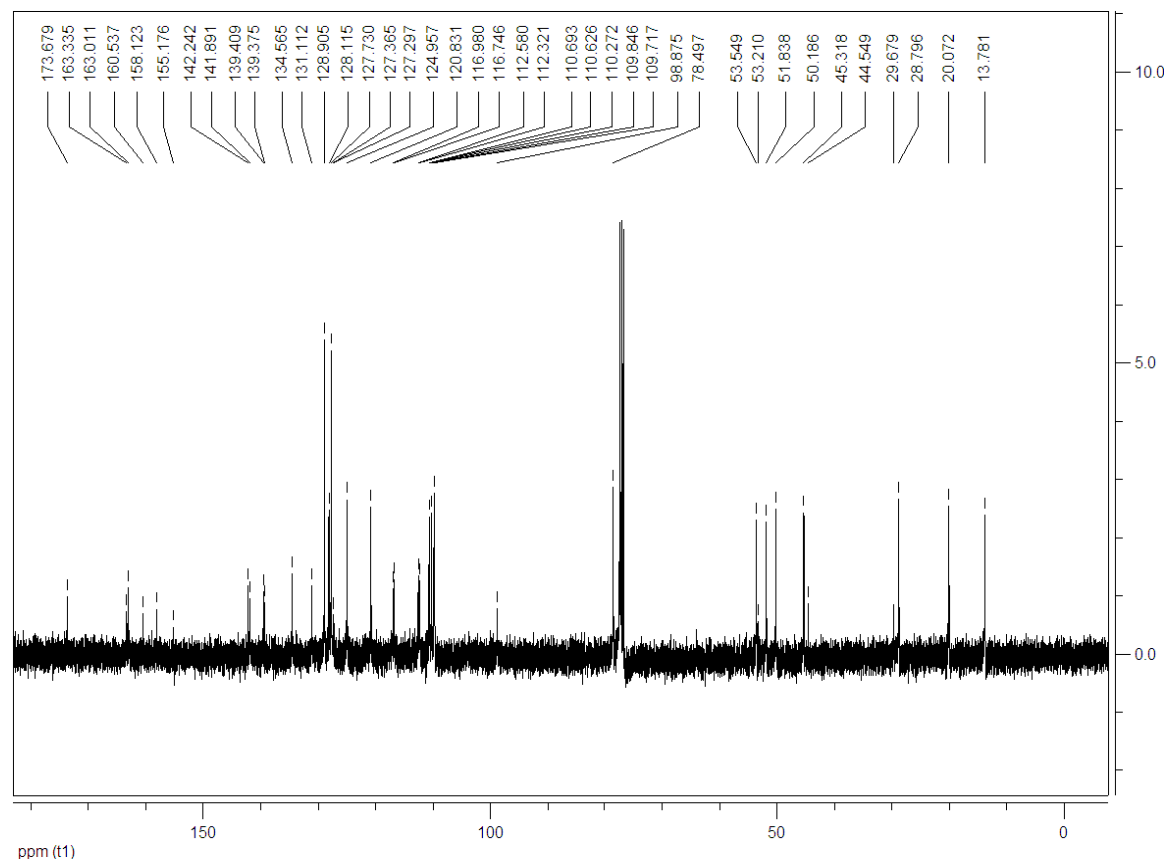

**Compound 2m':**

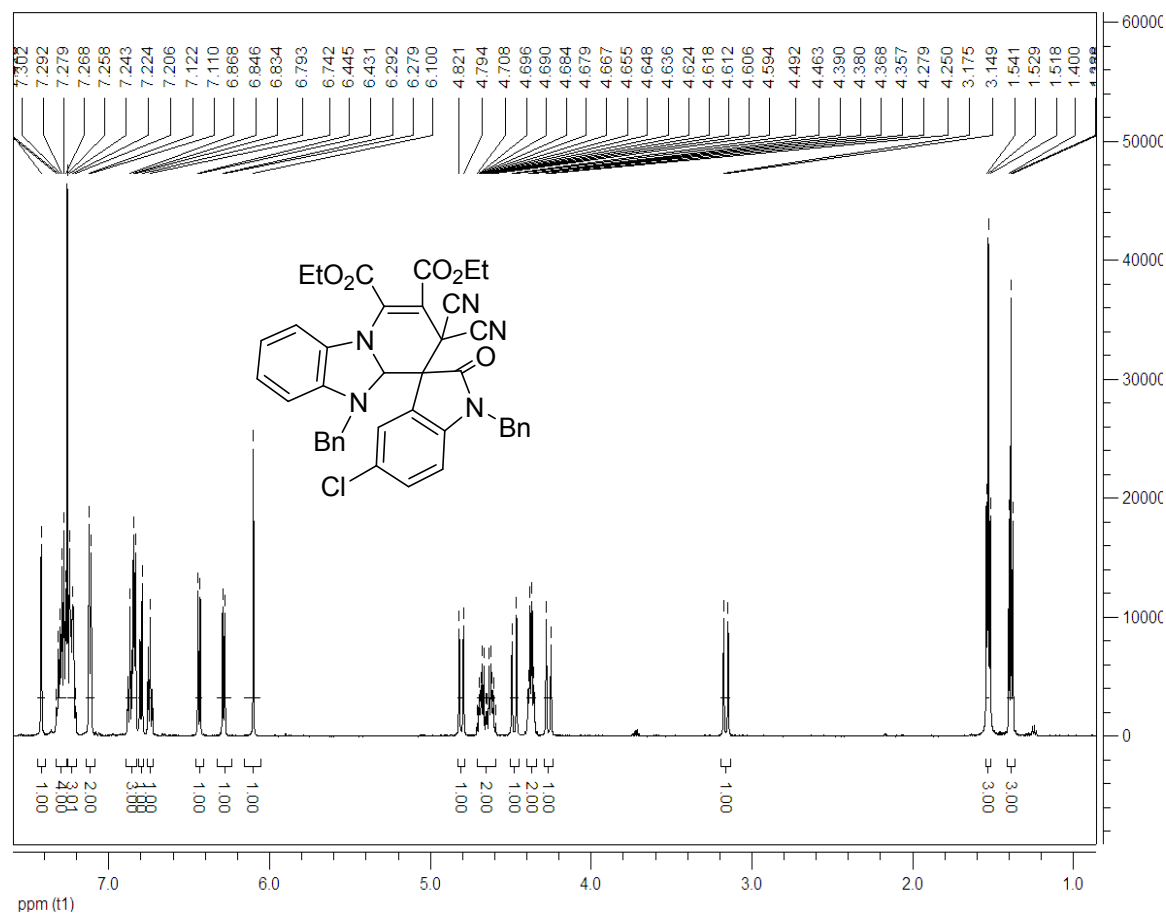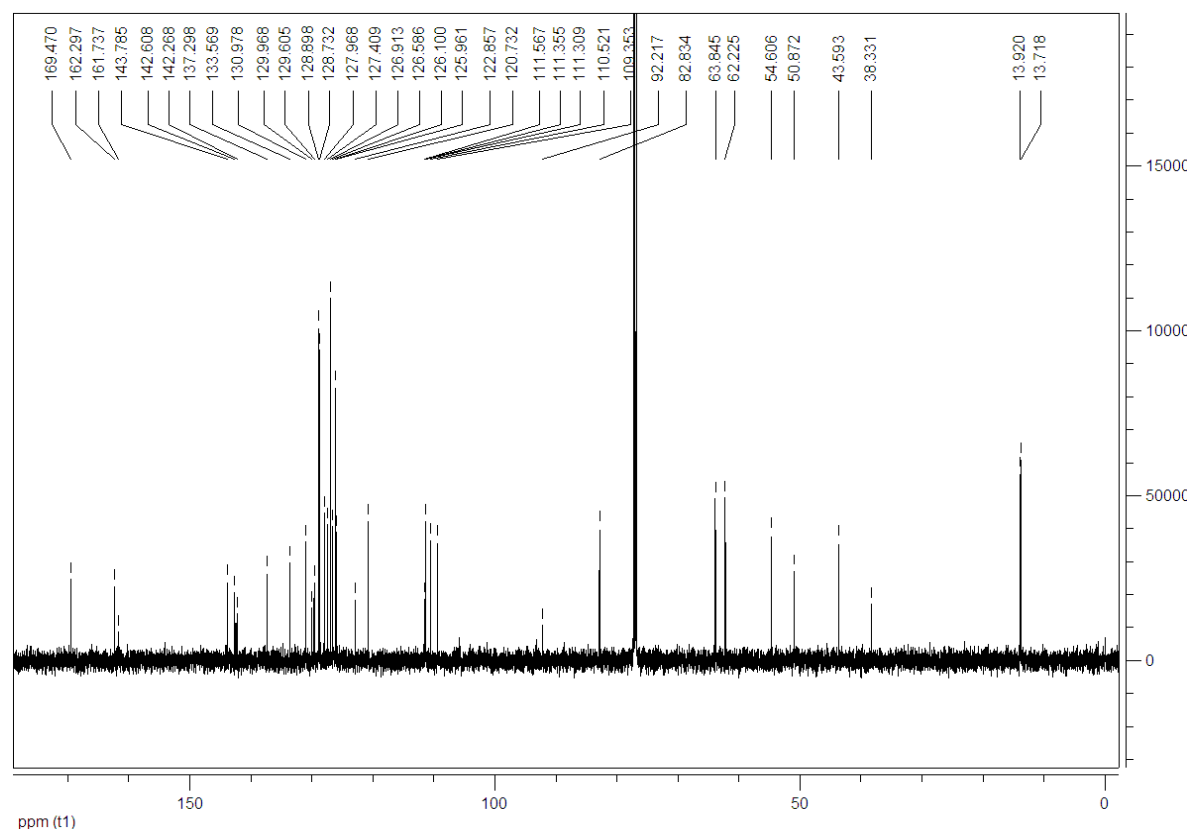

**Compound 2n'**:

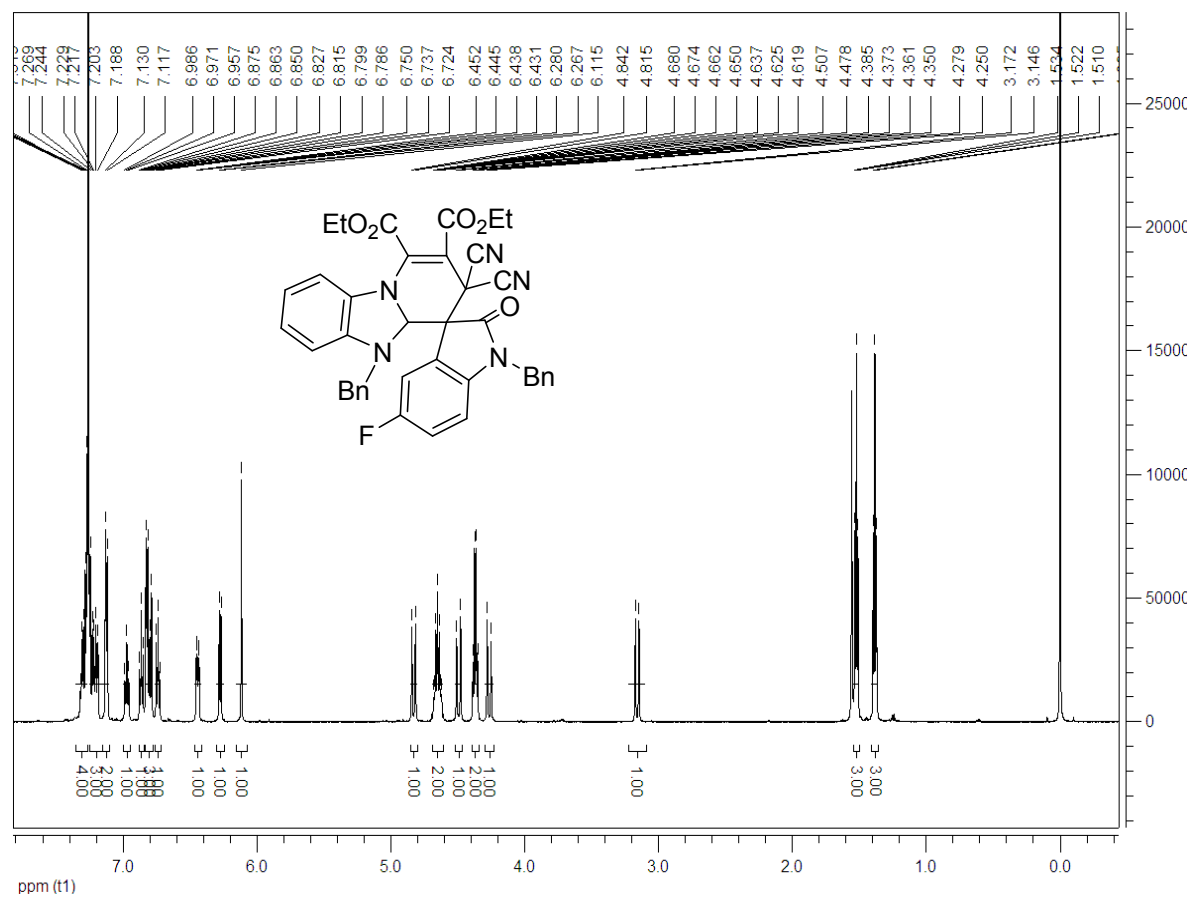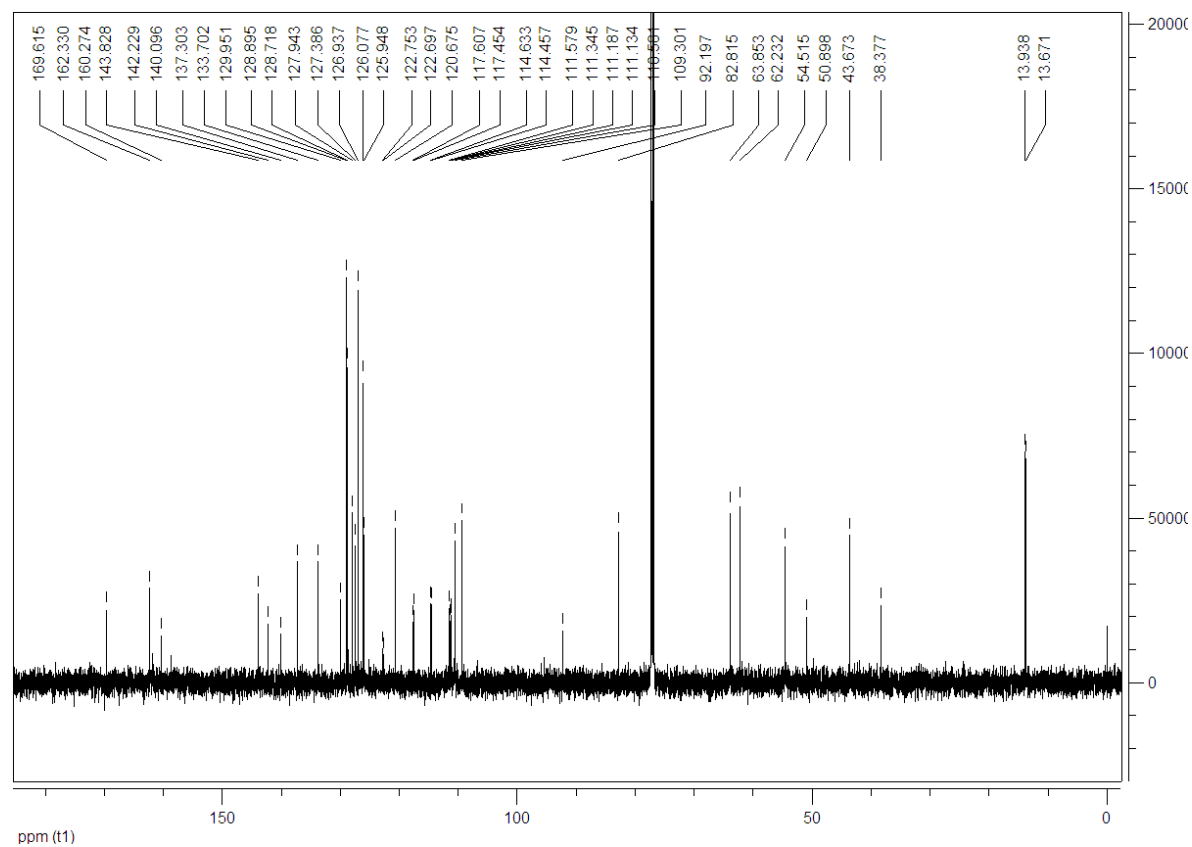

**Compound 2o':**

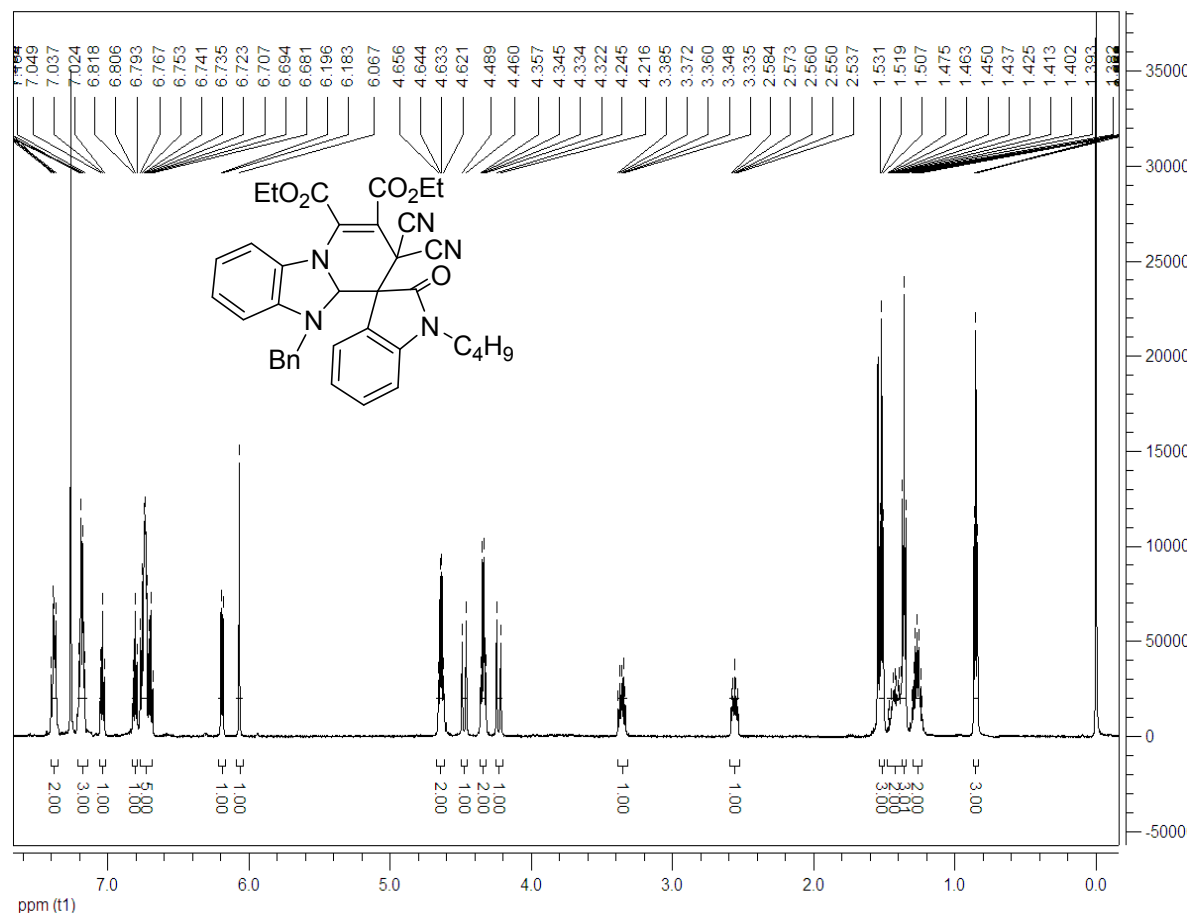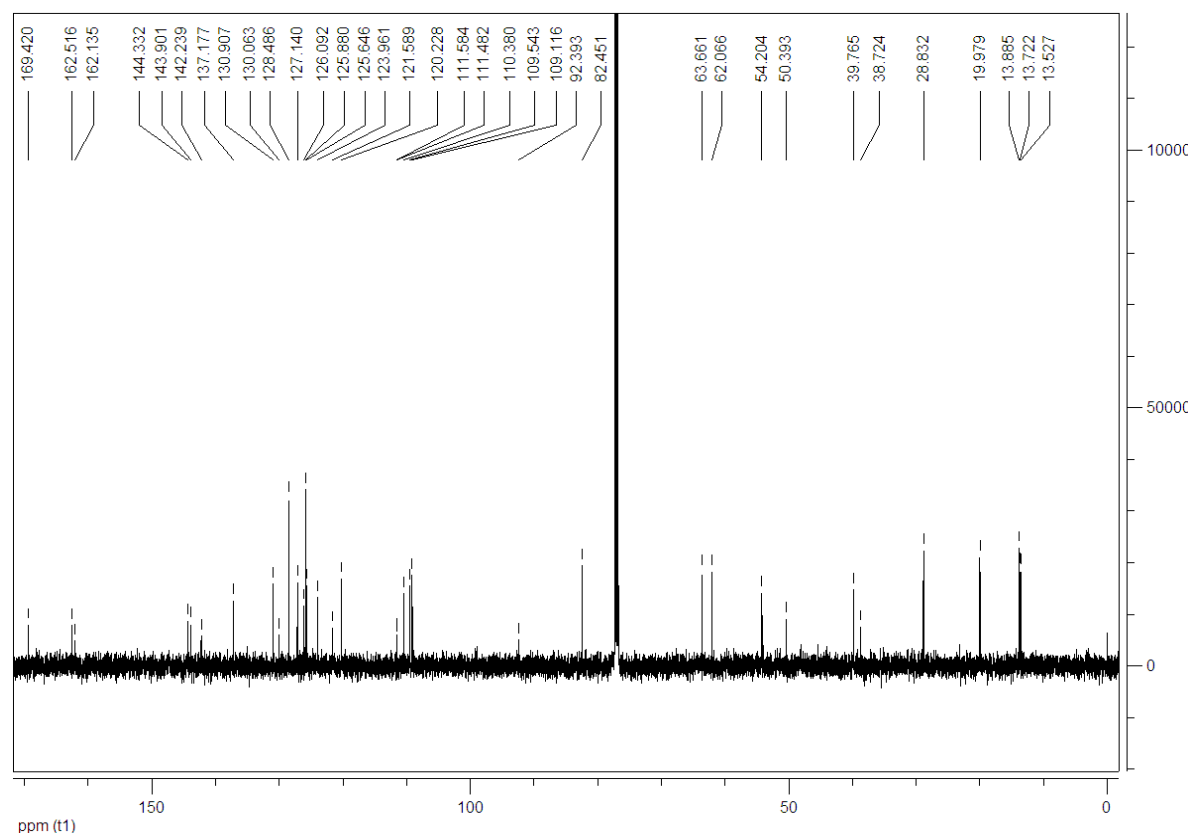

Supplement: c4ra12278j1.pdf [file c4ra12278j1.pdf]
